1 **Title:** Genome-wide analysis tracks the emergence of intraspecific polyploids in *Phragmites australis*  
2 **Authors:** Cui Wang, Dr., 1 Institute of Ecology and Biodiversity, School of Life Sciences, Shandong  
3 University, 72 Binhai Road, Qingdao 266237, China  
4 2 Shandong Provincial Engineering and Technology Research Center for Vegetation Ecology, Shandong  
5 University, 72 Binhai Road, Qingdao 266237, China  
6 3 Organismal and Evolutionary Biology Research Program, Faculty of Biological and Environmental  
7 Sciences, University of Helsinki, Viikinkaari 1, Biocentre 3, 00790 Helsinki, Finland  
8 **Lele Liu**, Dr., 1 Institute of Ecology and Biodiversity, School of Life Sciences, Shandong University, 72  
9 Binhai Road, Qingdao 266237, China  
10 2 Shandong Provincial Engineering and Technology Research Center for Vegetation Ecology, Shandong  
11 University, 72 Binhai Road, Qingdao 266237, China  
12 **Meiqi Yin**, Ms., 1 Institute of Ecology and Biodiversity, School of Life Sciences, Shandong University, 72  
13 Binhai Road, Qingdao 266237, China  
14 2 Shandong Provincial Engineering and Technology Research Center for Vegetation Ecology, Shandong  
15 University, 72 Binhai Road, Qingdao 266237, China  
16 **Franziska Eller**, Assistant Professor, 4 Department of Biology, Aarhus University, Aarhus, Denmark  
17 **Hans Brix**, Professor, 4 Department of Biology, Aarhus University, Aarhus, Denmark  
18 **Tong Wang**, Lecturer, 5 College of Landscape Architecture and Forestry, Qingdao Agricultural University,  
19 Qingdao, China  
20 **Jarkko Salojärvi\***, Assistant Professor, 3 Organismal and Evolutionary Biology Research Programme,  
21 Faculty of Biological and Environmental Sciences, University of Helsinki, Viikinkaari 1, Biocentre 3, 00790  
22 Helsinki, Finland  
23 6 School of Biological Sciences, Nanyang Technological University, Singapore  
24 **Weihua Guo\***, Professor 1 Institute of Ecology and Biodiversity, School of Life Sciences, Shandong  
25 University, 72 Binhai Road, Qingdao 266237, China  
26 2 Shandong Provincial Engineering and Technology Research Center for Vegetation Ecology, Shandong  
27 University, 72 Binhai Road, Qingdao 266237, China  
28 **Correspondence to:**  
29 Professor Weihua Guo, whguo@sdu.edu.cn  
30 Assistant Professor Jarkko Salojärvi, jarkko@ntu.edu.sg  
31  
32  
33  
34  
35  
36  
37

## 1 **Abstract**

2 Polyploidization is a common event in plant evolution, and it plays an important role in plant speciation and  
3 adaptation. To address the role of polyploidization in grass diversification, we studied *Phragmites australis*, a  
4 species with intraspecific variation of chromosome numbers ranging from  $2n=36$  to 144. A combined analysis  
5 of genome structure, phylogeny and population genetics were used to study the evolution of *P. australis*.  
6 Whole-genome sequencing of three representative lineages revealed the allopolyploid origin of the species,  
7 with subgenome divergence dating back to approximately 29 million years ago, and the genomes showed  
8 hallmarks of relaxed selection associated with asexual propagation. Genome-wide analysis of 88 individuals  
9 from different populations around the world using restriction site associated DNA sequencing (RAD-seq)  
10 identified seven main intraspecific lineages with extensive genetic admixture. Each lineage was characterized  
11 by a distinct ploidy level, mostly tetraploid or octoploid, suggesting several polyploid events. Furthermore, we  
12 observed octoploid and hexaploid lineages at contact zones in Romania, Hungary and South Africa,  
13 suggestively due to genomic conflicts in allotetraploid parental lineages. Polyploidy may have evolved as a  
14 strategy to escape from the evolutionary dead-end of asexual propagation and the resulting decrease in genomic  
15 plasticity.

## 16 **Introduction**

17 The rapidly increasing number of high quality plant genome assemblies have uncovered numerous  
18 polyploidization or whole genome duplication (WGD) events immediately prior to or co-occurring with the  
19 time of species divergence (Alix, et al. 2017). These events, originating from autopolyploid or allopolyploid  
20 hybrids, are particularly common among grasses (Estep, et al. 2014), for example, all cereals have undergone  
21 rho, sigma and tau WGD events. The grass family (Poaceae), which includes more than 10,000 species today,  
22 originated from a common ancestor with five chromosomes (Salse, et al. 2008). In cereals, a series of genome  
23 duplication and consecutive genome fractionation events, involving chromosomal structural rearrangements  
24 and losses of redundancy, led to a common ancestral genome with 12 chromosomes, shared across the early  
25 diverging grass subfamilies Anomochlooideae, Pharoideae, and Puelioideae (Levy and Feldman 2002; Salse,  
26 et al. 2008). Hence, all extant Poaceae species are paleopolyploids, in which polyploidization occurred millions  
27 of years ago (Levy and Feldman 2002). Depending on their lineages, the current diploids have experienced  
28 further WGDs in the form of allo- or autopolyploidization, giving rise to the current grass species.

29 A recent polyploidization event can be directly inferred when closely related species show different  
30 chromosome counts or genome sizes, which differ by an integer-valued factor. This can often be observed in  
31 species within the same genus, but in some cases different ploidy levels have been observed also within the  
32 same species, such as *Dupontia fisheri*, *Betula pendula*, *Lygeum spartum*, *Cynodon dactylon* and *Phragmites*  
33 *australis* (Raicu, et al. 1972; Brysting, et al. 2004; Salojärvi, et al. 2017; Abdeddaim-Boughanmi, et al. 2019;  
34 Zhang, et al. 2020). These species are thus ideal models to understand the factors that drive polyploidization.  
35 One critical step to characterize the extent of polyploidization is to assess the ploidy level directly by counting  
36 chromosome numbers of individual metaphases, or quantifying the genome size in the germplasm using, for  
37

1 example, flow cytometry and comparing it to the size in a known diploid representative. However, the tedious  
2 procedures and the need of appropriate facilities can be challenging. With the advance of next generation  
3 sequencing (NGS) technology, large quantities of NGS reads now provide a chance to infer the ploidy levels  
4 through alleles of the genetic markers. Tools such as ploidyNGS (dos Santos, et al. 2016), ConPADE  
5 (Margarido and Heckerman 2015) and nQuire (Weiß, et al. 2018) have been proposed for inferring ploidy  
6 levels by fitting a model to the allele frequencies from mapping against the reference genome or calculating  
7 the frequency of haplotypic contigs. However, the methods are still under development and demonstrate  
8 relatively high error rates. Therefore a robust method to determine the ploidy level is still needed to understand  
9 the evolution of polyploidy in plants.

10 Common reed, *Phragmites australis* (Cav.) Trin. ex Steud., is a tenacious cosmopolitan wetland species  
11 which provides habitats for small animals and is considered an ecosystem engineer. Similar to many other  
12 grass species, *Phragmites* has a basal chromosome count of  $x=12$ . However, the euploid chromosome count  
13 has proved to be versatile, ranging from  $3x$  to  $12x$  ( $3x$ ,  $4x$ ,  $6x$ ,  $7x$ ,  $8x$ ,  $10x$ ,  $11x$  and  $12x$ ), or even mixoploid  
14 (Connor, et al. 1998; Clevering and Lissner 1999). Tetraploid and octoploid individuals are most common in  
15 nature (Connor, et al. 1998; Clevering and Lissner 1999). Substantial efforts to investigate the evolution of  
16 speciation in *Phragmites* have been made, but the evolution of ploidy levels within this species is still unclear  
17 (Saltonstall 2002; Lambertini, et al. 2006; Lambertini, Mendelssohn, et al. 2012; Tanaka, et al. 2017; Liu, et  
18 al. 2020). To date, seven species, *P. australis*, *P. mauritanus* Kunth, *P. frutescens* H. Scholz, *P. dioica* Hackel  
19 ex Conert, *P. berlandieri* E. Fourn., *P. japonicus* Steudel and *P. vallatoria* (Plunk. ex L.) Veldk, have been  
20 described in *Phragmites* (Lambertini, et al. 2006). Most of them are distributed regionally, with only *P.*  
21 *australis* being cosmopolitan (Greuter and Scholz 1996; Clevering and Lissner 1999; Lambertini, et al. 2006).  
22 Ploidy variation was found in several species, e.g., *P. vallatoria* has  $2x$ ,  $3x$ ,  $4x$  with aneuploid representatives  
23 at all three ploidy levels, *P. japonicus* preserves  $4x$  and aneuploid  $8x$ , and *P. mauritanus* is mostly  $4x$   
24 (Lambertini, et al. 2006). Large intraspecific variation was documented in *P. australis* by morphological traits  
25 and molecular markers, and at least three subspecies have been suggested: *P. australis* ssp. *australis*, *P.*  
26 *australis* ssp. *altissimus*, and *P. australis* ssp. *Americanus* (Peterson and Soreng 2004; Saltonstall, et al. 2004;  
27 Lambertini, et al. 2006).

28 Based on non-coding chloroplast regions *trnT-trnL* and *rbcL-psaI*, researchers have classified lineages to  
29 57 haplotypes (Saltonstall 2016), roughly corresponding to geographic regions of origin. According to the  
30 standard naming system (Saltonstall 2002), several phylogenetic studies have found haplotype M to be  
31 commonly distributed in North America, Europe, and Asia, and later confirmed it to be an invasive lineage in  
32 North America (Saltonstall 2002). Haplotype I is distributed across South America, southern Pacific islands  
33 and Asia; haplotypes U and Q occur in Asia and Australia, whereas haplotype O is mainly distributed in  
34 northern China and haplotype P in Korea and middle to southern China. A number of unique haplotypes have  
35 emerged endemically in Mexico, or North America, and in southwestern China it is possible to find three main  
36 haplotypes I, Q, U (Saltonstall 2002; An, et al. 2012; Colin and Eguiarte 2016; Tanaka, et al. 2017). Because  
37 the chloroplast haplotypes are not continuously distributed within the same geographic region, it is difficult to

1 conclude how they spread originally, especially when considering the variation observed in intraspecific ploidy  
2 levels. Studies based on amplified fragment length polymorphisms (AFLP) and microsatellites have provided  
3 further support to the geographic lineage classifications. However, the AFLP produced only 107 variable sites  
4 among the species, which may not be sufficient for analyzing allopolyploid species with up to 144  
5 chromosomes (Lambertini, et al. 2006).

6 In United States, the range of exotic *Phragmites australis* has expanded from a very limited area to span  
7 almost the entire country within just 50 years, forcing the native lineages to the very north; it is thus considered  
8 an invasive plant (Saltonstall 2002). One hypothesis for the development of invasiveness in *P. australis* is  
9 related to polyploidizations (Clevering and Lissner 1999; Lambertini 2019), because polyploids, due to their  
10 higher level of genomic plasticity, can outperform their diploid progenitors in environments with high abiotic  
11 stress, and thus have access to a wider range of habitats (Godfree, et al. 2017). Successful allopolyploids may  
12 thus develop into invasive species and drive diploid ancestors to extinction by recurrent hybridizations with  
13 them.

14 In this study, we investigated the intraspecific genetic divergence, population genetic structure, historical  
15 demographics, and hybridization of *P. australis* using RAD-seq approaches that incorporated data from the  
16 nuclear genome and chloroplast from 88 individuals sampled throughout the geographic range of the species.  
17 To understand the geographic distribution of ploidy variation in the species, we developed a method based on  
18 alternative allele frequency of reads mapped to the reference genome to predict the ploidy level of each  
19 individual. We obtained high coverage Illumina sequencing data for the whole genomes of three individuals  
20 representing three lineages and assembled their draft genomes to investigate the genome evolution associated  
21 with polyploidization, and to give insights into the rise of whole genome duplications in grass species.

## 22 **Results and discussion**

### 23 ***Genome assemblies confirm allopolyploid structure of P. australis***

24 We carried out RAD-sequencing for a collection of 88 *P. australis* individuals from Eurasian, North American,  
25 Oceanian and African continents (Fig. 1, Table 1). A subset of these samples was quantified with flow  
26 cytometry to obtain genome size estimate (Table 1; flow cytometry info provided by H. B., the samples have  
27 been used in previous studies (Lambertini, et al. 2006)). For initial exploration of the RAD-seq data we carried  
28 out a *de novo* analysis using Stacks (Catchen, et al. 2013). Even though the method assumes the organisms to  
29 be diploid and only considers biallelic sites, we were able to obtain enough qualified variant sites to describe  
30 the population grouping of the species.

31 Based on the initial analysis, we identified three non-admixed representatives of distinct genetic  
32 lineages; the so-called US land type occurring in Gulf Coast (USland; individual Y7)(Lambertini,  
33 Mendelsohn, et al. 2012; Meyerson, et al. 2012), native US lineage limited to the North (Lambertini, et al.  
34 2006) (USnat; Y17) and Mediterranean lineage (Med; Y21)(Lambertini, et al. 2006). The three accessions  
35 were sequenced to 90x coverage using Novaseq short read sequencing and assembled using MaSurCA genome  
36 assembler after which contigs representing haplotype variants of the same locus were removed. The final  
37

1 assembly sizes were 922 Mb for US native lineage (Y17) and 815 Mb for Mediterranean lineage (Y21), nearly  
2 twice the monoploid Cx value (0.490, 479.22 Mbp)(Pyšek, et al. 2018). In contrast, the assembly size for  
3 USland (Y7) was 1.2 Gb. Quality assessment using universally conserved single-copy genes (BUSCO v5.2.1)  
4 yielded high values (92.3-98.0% completeness, Table 2), indicating that the draft assemblies were of  
5 comparable quality and that they had captured the gene coding space with high accuracy. We further noticed

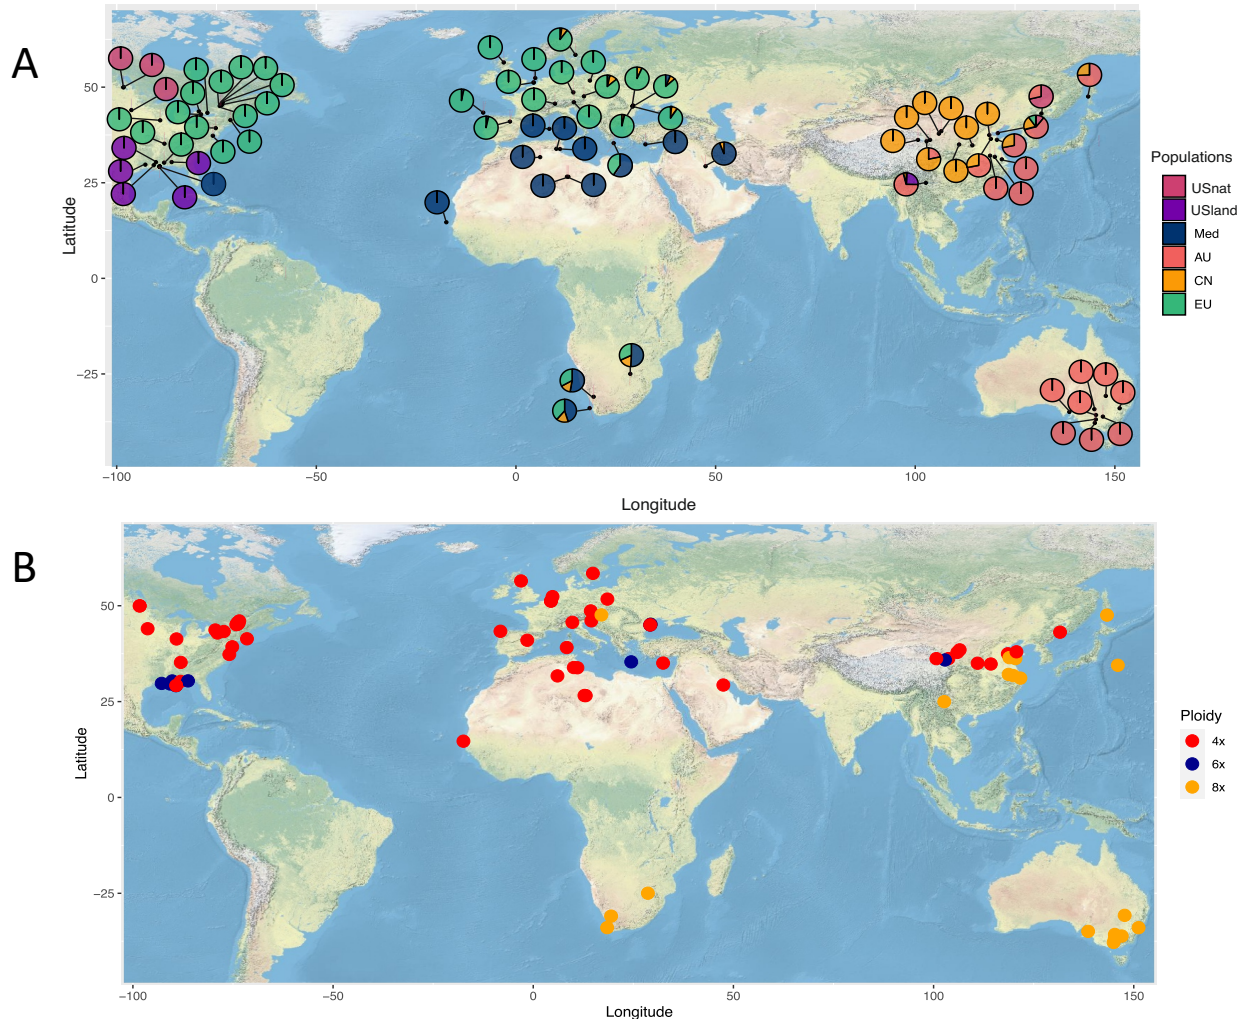

6  
7  
8  
9  
10  
11  
12  
Figure 1 Sampling locations of *Phragmites australis* individuals in the study. A) Pie charts indicate the genetic admixture proportions. B) Ploidy level estimates from flow cytometry. The ploidy levels of the individuals with no flow cytometry data were predicted using sequencing data, see Methods for a detailed description. Different colors represent distinct ploidy level.

7 equal proportions of duplicated genes across all assemblies (34-48.9%). The duplicated genes showed  
8 significant overlap among the three assemblies (Fig. 2A, Table 2), suggesting that the duplication is biological  
9 and likely associated with the polyploid nature of *P. australis*. Genome annotation was carried out next, by  
10 combining homology information from two Poales species, *ab initio* gene predictors and publicly available  
11 RNAseq data into consensus predictions using Evidence Modeler (Haas, et al. 2008; Salojärvi, et al. 2017).  
12 The highest number of protein coding genes were predicted in USland (Table 2).

1 *Phragmites australis* has previously been suggested to be an allopolyploid species (Raicu, et al. 1972) but  
2 this hypothesis has been largely left unexplored due to limited evidential support. To study this hypothesis, we  
3 carried out syntenic alignments against *Oropetium thomaeum* genome assembly. For all assemblies two peaks  
4 in the synonymous (Ks) mutation spectra were detected, suggesting that the two subgenomes have different  
5 divergence times from *Oropetium*, thus confirming an allopolyploid origin for *P. australis* (Fig 2 B). All  
6 assemblies had roughly equal numbers of syntenic blocks, providing yet no explanation to the larger assembly  
7 size in Y7 (Table S1).

8 We next used the Ks (synonymous substitution rate) values to phase syntenic blocks with Ks values between  
9 0 - 0.63 to subgenome A, and blocks with Ks values between 0.63 - 2 to subgenome B (Table S1). Divergence  
10 time estimation for the phased duplicates of universally conserved single-copy genes (BUSCOs), using  
11 divergence time with *O. sativa* as calibration point, showed that the subgenomes diverged at ca. 29.07 Mya  
12 (95% Highest Posterior Density, HPD 26.74 – 31.70 MYA) (Fig. 2C). Both subgenomes gave largely  
13 concordant evidence about the later divergence between the three lineages. In subgenome A, USnat lineage  
14 diverged from others at 5.58 MYA (95% HPD 4.83 - 6.40MYA), followed by divergence between Med and  
15 USland lineages at 2.44 MYA (95% HPD 2.02 - 2.87MYA). In subgenome B, USnat diverged from others at  
16 6.84 MYA (95% HPD 6.02 - 7.72MYA), followed by divergence between USland and Med at 2.66 MYA (95%  
17 HPD 2.28 – 3.03Mya) (Fig.2 C), indicating roughly similar evolutionary rates for the two subgenomes. It is  
18 not known when the allopolyploidization event occurred, but the clear separation of the two subgenomes  
19 suggests that the two ancestral species have evolved independently for a considerable time to produce barriers  
20 for gene flow between the two subgenomes. It is worth noticing that the divergence time between *Arundo* and  
21 *Phragmites* species was also estimated to be 29 Mya(Hardion, et al. 2017), therefore one possible scenario is  
22 that the current genome is generated by ancestor of *Phragmites* hybridizing with an ancestral species of the  
23 *Arundo* genus.

### 24 ***Alternative allele percentage spectrum predicts differing ploidy levels***

25 The percent of reads supporting reference vs. alternative allele in a locus can be used as a tool to assess the  
26 ploidy levels of the individuals (Augusto Corrêa dos Santos, et al. 2017). For all individuals with whole  
27 genome sequencing data the allele percentage histograms showed a main peak at 0.5, but the overall shape  
28 differed. In USnat and Med, two side peaks were observed at 0.09 and 0.91, whereas in USland the major peak  
29 was wider and less steep (Fig. 2D-F). We hypothesized that the inconclusive shape was due to repeat elements  
30 and other ambiguously mapping regions in the genomes, and therefore focused the analysis on the gene models  
31 with assignments to subgenome A or B based on the Ks values. Both USnat and Med displayed a clear main  
32 peak at 0.5 and retained two side peaks at 0.09 and 0.91 (Fig. 2D-E), indicating the subgenomes were diploid,  
33 and thus these two lineages should be regarded as allotetraploid. On the other hand, for USland two major  
34 peaks at 0.337 and 0.669 were observed (Fig. 2F), suggesting a hexaploid genome organization; higher ploidy  
35 level also explains its 1.5x larger assembly size. Moreover, the number of conserved single-copy genes  
36 (BUSCOs) with three duplicates is much higher in Y7 (106 copies) than in Y17 (51 copies) and Y21 (58  
37

1 copies), which further supports the hypothesis (Table 2). Therefore, USland lineage most likely resulted from  
 2 a tetraploid – octoploid hybridization event.

3 Although both USnat and Med lineages were allotetraploid, the genome size and gene count of USnat was  
 4 roughly 14% higher than Med lineage. The two lineages diverged at 5.58 – 6.84 Mya in late Miocene,

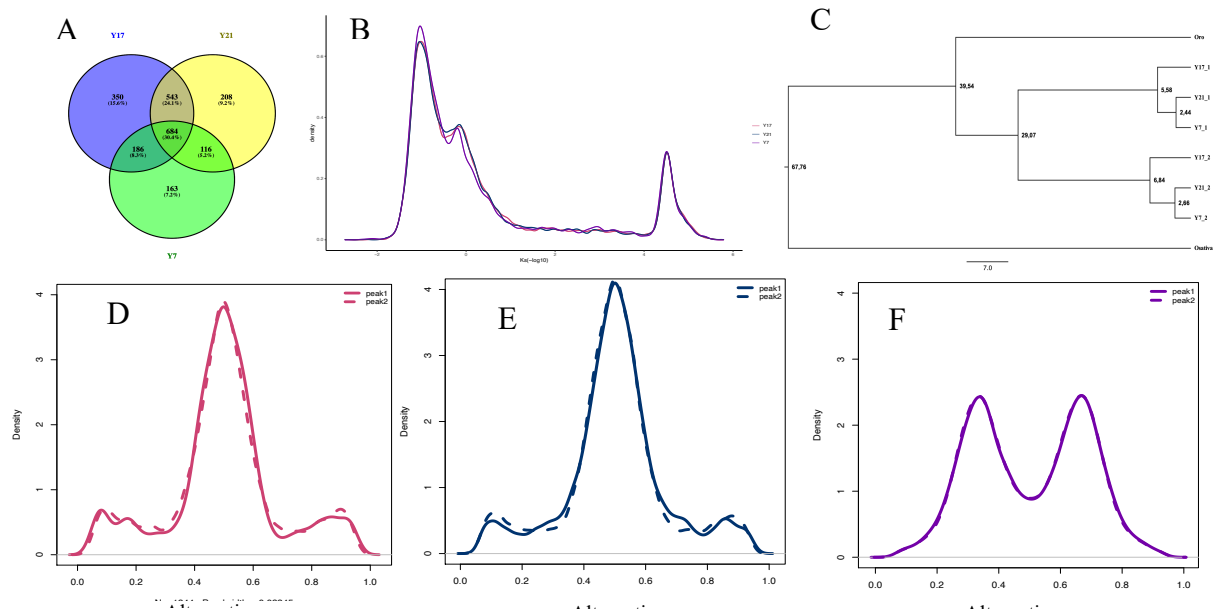

Figure 2 A) Overlap of the multicopy BUSCOs among genomes Y17, Y21, and Y7. B) Histograms of Ks values of syntenic genes of Y17, Y21 and Y7 genomes when aligned against *Oropetium thomaenum* genome. C) Divergence time of *Phragmites australis* subgenomes estimated from single copy genes in the ancestors and duplicated genes in current *P. australis* lineages. D-F) Allele frequency of reads mapped to peak1 and peak 2 in Y17, Y21 and Y7.

5 suggesting that different lineages may have been going through differential gene loss in diploidization (Jones  
 6 and Pašakinskienė 2005). There were 1916 duplicated BUSCOs shared by USnat and Med lineage, but only  
 7 1203 (62.79%) of these were also shared with USland with 1665 duplicated BUSCOs. One possible reason for  
 8 the increased amount of copies in USland could be that the remaining duplicates were inherited from another  
 9 closely related species or an allopatric diverged population.

### 11 **Population genetics analysis reveals links between polyploidization and lineage divergence**

12 The initial *de novo* assembly of RAD-tags generated 4,565,536 loci with the average length of 521.3 bp and  
 13 mean effective coverage of 39.0x per sample (with minimum 22.8x and maximum at 65.7x). Altogether the  
 14 regions contained 40,507,058 single nucleotide polymorphism (SNP) sites. In contrast, a reference-guided  
 15 alignment against USnat assembly resulted in 7,045,580 loci and 19,535,449 SNP positions, suggesting that  
 16 many of the *de novo* loci were collapsed assemblies of the two subgenomes. In the reference-based RAD  
 17 analysis the region length was 305.9, and the mean coverage of each sample was 39.6x (minimum coverage  
 18 23.9x, maximum coverage 65.8x). From this set, 16,500 SNPs mapped into chloroplast genome.

### 20 **Population structure shows a split into six lineages according to geographic location**

1 After selecting one random SNP from each Stacks locus, we obtained 538,761 variant sites in total, and 13,536  
2 variants remained after selecting loci with no more than 10% missing values and minor allele frequency greater  
3 than 5%. Maximum likelihood phylogenetic trees revealed seven distinct genetic clusters, namely Native  
4 American lineage (USnat), Australian lineage (AU), Chinese lineage (CN), European lineage (EU), South  
5 African lineage, Mediterranean lineage (Med), and US land type (USland) (Fig. 3B). USnat and AU lineages  
6 diverged from other lineages at an early stage. Subsequently, CN lineage split from EU, South Africa, Med  
7 and USland. Population structure analyses using fastSTRUCTURE supported K=6 as the best number of  
8 clusters, in terms of highest marginal likelihood. These six genetic groups coincided with the geographical  
9 area, corresponding to USnat, USland, Med, AU, CN, and EU in the phylogenetic tree (Fig. 3B). Admixed  
10 individuals were mainly detected between AU vs CN, EU vs CN, and Med vs EU vs CN (Table 3).

11 The phylogeny based on RADseq loci mapping on chloroplast showed a similar split into six genetic groups  
12 corresponding to USnat, AU, USland, Med, CN and EU (Fig. 4), with varying bootstrap support values.  
13 Around 14 individuals showed discordant placement between chloroplast and nuclear trees, which is very  
14 likely a result from different origins of maternal lineages, pointing towards several independent hybridization  
15 events and extensive gene flow. For example, five individuals of Med lineage carry chloroplast from EU  
16 lineage, whereas two individuals from EU lineage and three individuals from Med lineage carry CN chloroplast;  
17 another four genetically admixed individuals carry the chloroplast of the group intermediate between main  
18 genetic groups (Fig. 4).

19

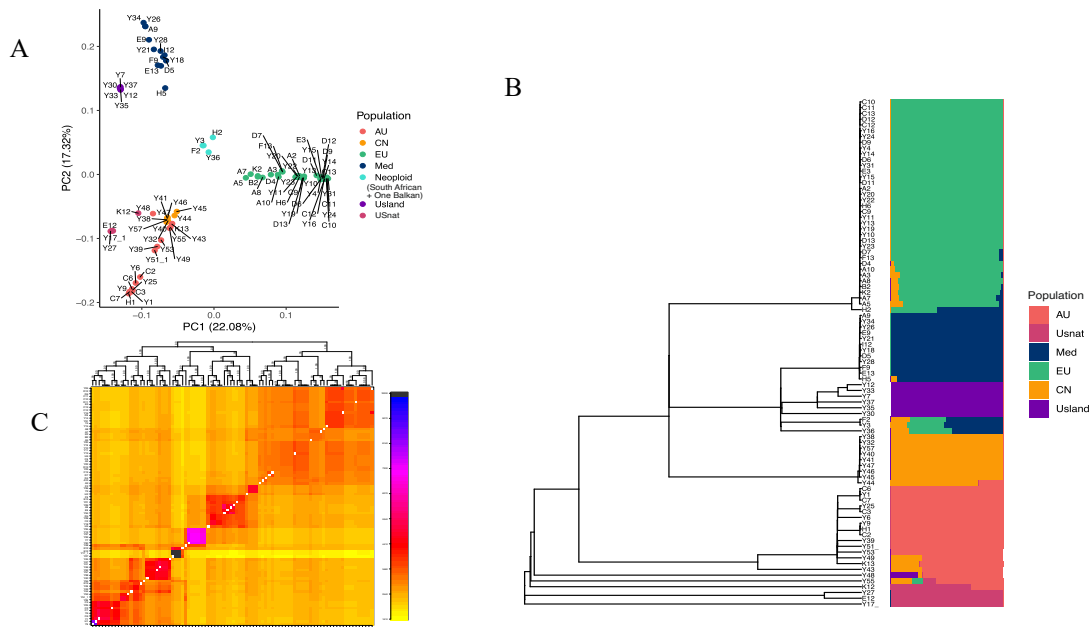

Figure 3 Nuclear phylogeny and population structure of *Phragmites australis* lineages. A) Population structure of *P. australis* samples from principal component analysis based on variants called against the reference genome Y17. B) Left: Maximum likelihood phylogenetic tree estimated from 3,023,618 variants aligned to Y17, with 10% of missing data allowed; Right: fastStructure population assignments based on variants. C) Genetic clusters revealed by fineRADstructure based on genetic similarities among individuals from *de novo* analysis. Darker colors indicate higher level of similarity.

20



1 Our data showed a rather clear geographic distribution of each genetic group: USnat lineage is distributed  
2 at the border of United States and Canada, whereas USland type is distributed at the Gulf of Mexico; Med  
3 lineage are found in Mediterranean regions, North Africa and Gulf of Mexico; CN lineage are mainly located  
4 along the Yellow River in China; AU lineage is colonizing Australia, Southern China, Pacific peninsula and  
5 islands, Korean peninsula; EU lineage is dominant across Europe, and also the invasive lineage in United  
6 States; finally, the Neoploid (South Africa) lineage is distributed in South Africa (Fig. 1). Although we could  
7 not obtain the sequences of *trnT-trnL* and *rbcL-psaI* regions to directly compare the results with previous  
8 studies based on chloroplast haplotypes (Saltonstall 2002; Saltonstall 2003; An, et al. 2012), we could infer  
9 the corresponding haplotypes by the corresponding geographic locations (Table S2). For example, the  
10 chloroplast haplotype P which is distributed in Eastern China may represent AU lineage, as they have  
11 overlapping geographic occurrences (Lambertini, et al. 2020; Liu, et al. 2020).

12 The geographic distribution of *P. australis* lineages was not precisely concordant with their origins, most  
13 likely due to extensive gene flow between the populations or frequent artificial transfer. For example, the  
14 nuclear phylogeny showed a subset of North American samples clustering together with a subclade of EU,  
15 indicating an artificial introduction from EU to North America (Saltonstall 2002). In addition, some introduced  
16 individuals in US (sample information obtained from H. B.) were found in several subclusters of the EU  
17 lineage suggesting multiple introductions to North America. These individuals spread quickly and are known  
18 to be invasive in North America (Saltonstall 2003).

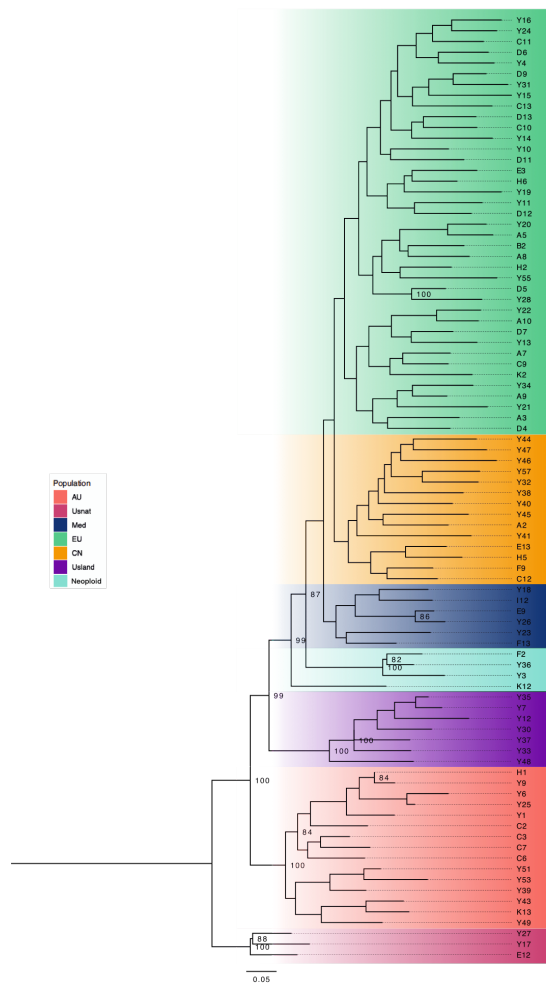

1

Figure 4. Phylogenetic tree constructed from chloroplast reads subtracted from RAD-seq dataset and mapped to chloroplast genome. Branch colors indicate the genetic groups corresponding to nuclear trees. Number on the node shows bootstrap value from 100 replicates, and only bootstrap value higher than 80 are showed.

2

### 3 *Multiple ploidy levels in P. australis*

4 For RAD-seq data, a histogram of the proportion of reads supporting alternative allele calls showed modes at  
5 around 50% in flow cytometry-confirmed tetraploids, at 0.35, 0.65 in hexaploids, and between 0.35 – 0.65 in  
6 octoploids (Fig. S1). Of the total of 88 *Phragmites* individuals, the ploidy levels of 54 individuals were  
7 quantified with flow cytometry, and only four samples showed different patterns between flow cytometry and  
8 our prediction method (Y12, Y24, Y37, K2); this could be an error in flow cytometry or aneuploidy of the  
9 same individual. Therefore, the prediction accuracy is at least 92.6% (Table 1), indicating that the prediction  
10 of ploidy levels from RAD-seq data can be done accurately. Our approach is intuitive to visualize and is suited  
11 for large plant genomes with high ploidy levels. However, it should not be treated as a replacement of  
12 traditional methods for determining ploidy level but could be used as a complementary method in addition to  
13 the flow cytometry results.

14 Using our approach, we predicted the ploidy levels for the remaining 34 individuals. Most individuals  
15 from North America, Northern China, Mediterranean regions, and Europe (representing USnat, CN, Med, EU

1 lineages; see Fig. 3) were predicted to be tetraploid, showing unimodal distribution peaking at 0.5 (Table 1;  
 2 Fig 5A-D). All representatives from Gulf Coast (USland lineage, Fig. 3), and a few admixed individuals (Fig.  
 3 3), were predicted to be hexaploids (Fig. 5 E-F), whereas all Australian (AU lineage, Fig. 3) and a few admixed

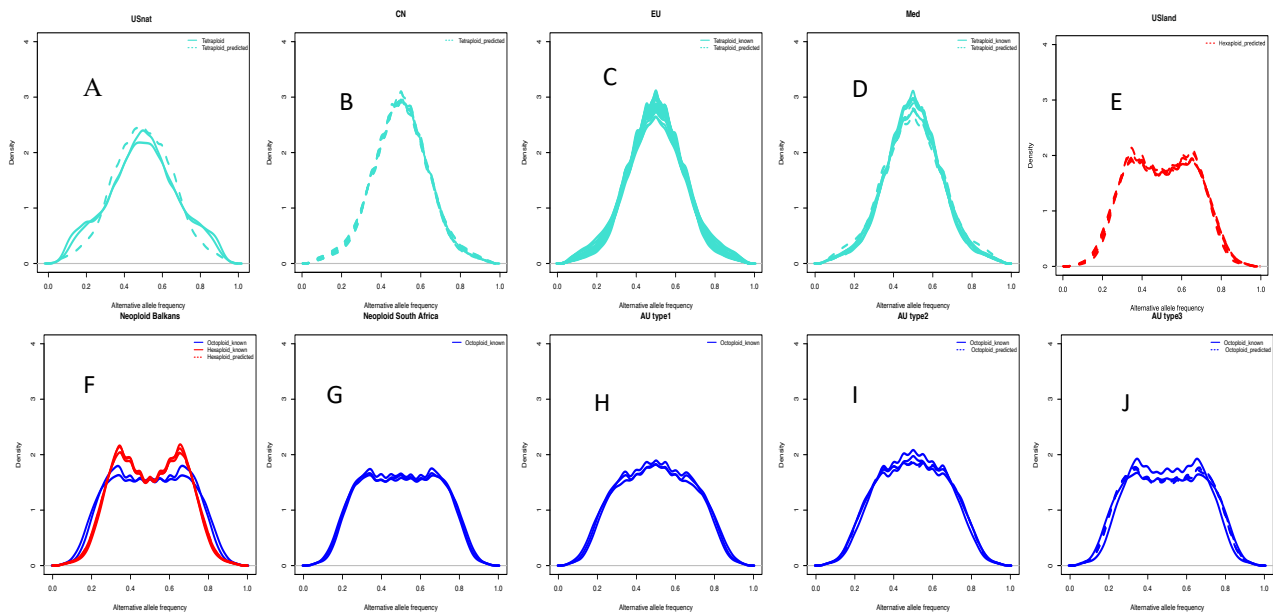

Figure 5 The alternative allele frequency histograms from aligning the RAD-seq reads to the Y17 reference genome. Solid line shows frequency distribution of alternative alleles in individuals where the result was confirmed with flow cytometry. Dashed line shows frequency distribution of alternative alleles in individuals with missing or differing flow cytometry measurement. Turquoise, red and blue color represented tetraploid, hexaploidy and octoploid respectively. Pattern of alternative allele frequency in population USnat (A), CN (B), EU (C), Med (D), USland (E), Neoploid (F-G), and AU (H-J).

4 individuals from South Africa and Mediterranean region (Fig. 3) were predicted to be octoploids (Table 1,  
 5 Table 3; Fig. 5 F-J). In sum, each lineage detected in population structure analyses was characterized by its  
 6 own ploidy level: The AU is octoploid, the USland is hexaploid, and the Neoploid (South Africa) is octoploid.  
 7 The other lineages such as CN, Med, and most EU individuals are tetraploid.

8 Out of 20 admixed individuals, 13 showed increased ploidy levels and two individuals showed decreased  
 9 ploidy levels compared to parental populations. Five individuals, including samples from South Africa,  
 10 Romania and Hungary, were admixed offspring of tetraploid lineages CN, EU and Med (Fig. 3), but they were  
 11 found to be octoploid, while another three individuals of the same background were predicted to be hexaploids,  
 12 and we refer to these individuals as Neoploid (Balkans); see Fig 5F-G, samples Y3, Y36, A5, A7, A8, B2, F2,  
 13 H2 and K2 (Table 3). The octoploids in the Danube delta were classified into EU lineage previously  
 14 (Lambertini, Eller, et al. 2012).

15  
 16  
 17 *Ploidy levels and geography explain the population structure*

18 To test whether the different ploidy levels are visible in the SNP patterns we next assessed the population  
 19 structure in *P. australis* with principal component analysis. The first three principal components explained  
 20 52.1% of the data and showed segregation pattern according to geography and ploidy level. The hexaploids

1 largely fell between the tetraploid and octoploid population groups (Fig. 3A). The EU, USland and South  
2 African octoploids were separated from the others by the first PCA axis, and the second axis further  
3 distinguished Med and AU/CN lineages (Fig. 3A). Although AU and CN were of different ploidy levels, they  
4 were not clearly distinguishable from the PCA plot. One rare individual, Y48, with admixture from AU,  
5 USland and CN, was located between the AU and USland populations, in agreement with the admixture result  
6 (Fig. 3A).

7 For more accurate quantification of the covariates contributing to genetic variation we carried out  
8 redundancy analysis (RDA; Fig. 6)(Israels 1984; Capblancq, et al. 2018). Altogether 42.9% of the total genetic  
9 variation was explained by the population groups, whereas ploidy levels accounted for 9.7% of the variation.  
10 Geographic coordinates accounted for a small but significant proportion of 2.1% of variance (latitude,  $p=0.01$ ;  
11 longitude,  $p=0.01$ , respectively) after modeling the effect of population group as covariate. The ploidy levels  
12 were confounded within the population groups, and thus the ploidy did not explain any additional variance  
13 after including the groups as covariate. Similarly, more fine-scale genetic coancestry estimation with  
14 fineRADstructure also revealed seven clusters (Fig. 4C), with most of the groups corresponding to the  
15 geographic locations, showing high genetic coancestry of AU, USland, Med, South African, USnat, CN and  
16 EU lineages. Because the South African individuals formed a group of neopolyploids with similar admixture  
17 from the tetraploid CN, EU and Med lineages, we refer the lineage as Neoploid (South Africa) in further  
18 analyses.

19 We next carried out modeling of population divergence times using Approximate Bayesian Computations  
20 (ABC) modeling in Fastsimcoal2 by fitting joint site frequency spectrum (SFS) two-population split models.  
21 To summarize the splits, we constructed a neighbor network based on the pairwise divergences. The topology

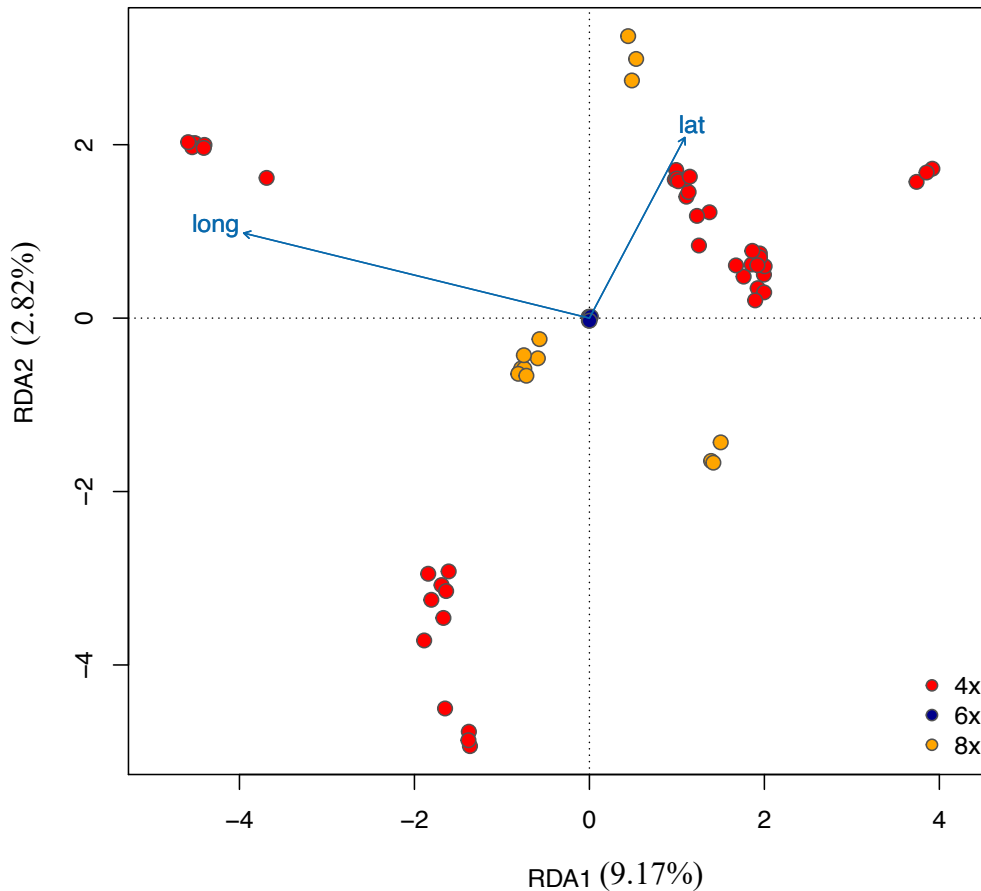

Figure 6 RDA analysis under constraint model using ploidy level as covariates. RDA1 explains 9.17% of the data, and RDA2 explains 2.82% of the data. The arrows lat and long indicated the latitude and longitude of sampling sites of each individual. Ploidy level explains 15.78% of the variance and latitude and longitude explains 7.87% of variance.

1  
2 of the network slightly differs from the phylogeny, possibly because the method is not limited to bifurcating  
3 trees (Fig. 7C), and provides a viable hypothesis that takes into account also the gene flow between populations.  
4 Altogether, a split between Asian and European populations is detected, with the hexaploid hybrid USland  
5 intermediate to Med and USnat. MRCA of USnat and the remaining lineages fell in the range 3.42 - 9.16 Mya,  
6 using generation time range of 2 - 4 years (Table 9). Moreover, AU diverged from CN at 1.74 - 3.48 Mya, and  
7 EU diverged from Med at 1.64 - 3.28 Mya, and Med diverged from USland at 1.34 - 2.68Mya (Fig. 7 C; Table  
8 9). These populations diverged within the last 1.34 - 3.48 million years in Pliocene and Pleistocene, indicating  
9 that the climate change during Pleistocene glaciation cycles may have enhanced lineage divergence and  
10 polyploidization.

11 According to the leading-edge hypothesis, source populations would preserve more genetic diversity than  
12 populations in the new territories during the spread of the species (Hewitt 1996), and studies on human  
13 populations have displayed the so-called serial founder effect, in which the diversity of the populations  
14 decreases in proportion to the distance to Africa, due to a series of founding events from diminishing

1 populations (DeGiorgio, et al. 2009). To test whether the spread routes of *Phragmites* populations could be  
2 identified in a similar manner, we compared geographically isolated individuals from the same genetic group.  
3 For pure EU lineage, nucleotide diversity of the North American populations originating from Europe (0.12726,  
4  $n = 14$ ) is lower than within European populations (0.17707,  $n = 16$ ), in support of the known founding event.  
5 For AU lineage, the nucleotide diversity of Southeastern China population (0.16872,  $n = 6$ ) was higher than  
6 Australian populations (0.13283,  $n = 8$ ). However, if only pure individuals of AU lineage were considered, the  
7 nucleotide diversity of Chinese population (0.13337,  $n = 3$ ) was lower than the Australian population (0.16872,  
8  $n = 6$ ), illustrating the effect of admixture on nucleotide diversity. Tetraploid lineages of *P. australis* showed  
9 a decrease of genetic diversity from CN (0.096761,  $n=8$ ) to EU (0.095245,  $n=26$ ), Med (0.074062,  $n=11$ ) and  
10 USnat (0.0207,  $n=3$ ), suggesting the core lineage of *P. australis* originated in temperate grasslands of the  
11 former Laurasia (see (Pound, et al. 2011) for a reconstruction of a late Miocene vegetation map), split into  
12 Asian and European populations and further into Mediterranean population. Based on our phylogenies USnat  
13 lineage diverged early from the main Laurasian population, most likely already during the Tortonian period.  
14

#### 15 *Extensive gene flow in Phragmites australis*

16 Genetic divergence between USnat and any other lineage was very high ( $F_{st} > 0.44$ , Table 8), especially  
17 with USland, see (Lambertini, Mendelssohn, et al. 2012; Liu, et al. 2018), confirming the distant genetic  
18 relationship with the rest of the lineages (Table 8). USland showed exceptionally high divergence with  
19 Neoploid ( $F_{st} = 0.44689$ ), but moderate divergence with AU, EU, CN and Med ( $0.29 < F_{st} < 0.35$ , Table 8). The  
20 lowest  $F_{st}$  value was observed between Neoploid (South Africa) and EU lineages (0.17126), suggesting recent  
21 gene flow (Table 5, 8). We therefore analyzed the gene flow using formal tests of introgression.

22 Population migrations estimated with Treemix yielded a concordant topology with the maximum likelihood  
23 phylogeny tree, suggesting one early migration event to USland lineage from an ancestral lineage not related  
24 to USnat (Fig. 7A) as the best model. However, F3 tests of admixture yielded positive values for all seven  
25 groups, providing no evidence of hybridization (Table 4). Therefore, gene flow suggested by Treemix is  
26 probably from a ghost lineage not sampled in our study (Fig. 7A). In fact, USland lineage, habituated in the  
27 Gulf Coast of North America, has been regarded as a hybrid of Mediterranean *P. australis* and *P. mauritanus*  
28 (Lambertini, Mendelssohn, et al. 2012). Similar to Mediterranean *P. australis*, the USland lineage shows  
29 significantly higher photosynthetic efficacy than EU lineage, which is probably an adaptive mechanism to the  
30 climate in its origins at tropical Africa and the Mediterranean area (Nguyen, et al. 2013). On the other hand,  
31 previous studies have showed that USland lineage holds a 200bp band in its *waxy* gene which specifically  
32 exists in *P. australis*, and also a 100bp DNA which is specific in *P. mauritanus* (Lambertini, Mendelssohn, et  
33 al. 2012), confirming its hybrid status. Hybridization between *P. australis* and *P. mauritanus* has also been  
34 observed in Southern Africa during recent decades (Canavan, et al. 2018). Due to the lack of proper outgroup  
35 for USland, we were not able to test the gene flow between USland and Med using D statistics. However,  
36 USland groups together with Med lineage in nuclear phylogenetic topologies (Fig. 4B; Fig. 7A), and the

1 absolute genetic distance  $d_{xy}$  between USland and Med is lower than for any other lineage (Table 8), in support  
 2 of the hypothesis that Med is probably the second parental lineage of USland.

3 For the other lineages, from the 40 quartets of lineages compared with the ABBABABA analysis using  
 4 USnat as outgroup, altogether 30 quartets tested significant (Table 5), suggesting gene flow among most of  
 5 the lineages (Table 5). The gene flow between the lineages was further confirmed by D statistics for randomly  
 6 sampled four representative individuals from each lineage (except South Africa lineage); the individual tests  
 7 confirmed the gene flow results from population-level data but also revealed possible gene flow between Med  
 8 and AU, and Med and USland (Table S3). The complex pattern of admixture between nearly every population  
 9 tested suggests extensive global gene flow between populations; similar conclusion can be drawn from the  
 10 admixture analysis where 25% of all individuals were found to be admixed, as well as from the incongruence  
 11 between nuclear and organellar phylogeny. The admixture analyses and ABBABABA tests (Fig. 2B, Table 5)  
 12 further supported extensive hybridization between AU and CN lineages, suggesting the AU lineage may have  
 13 been widely spread throughout the Asian continent. The CN clade was mainly confined within the Yellow  
 14 River watershed, so this lineage may have occurred later from the west of China and spread along the river to  
 15 eastern China.

16

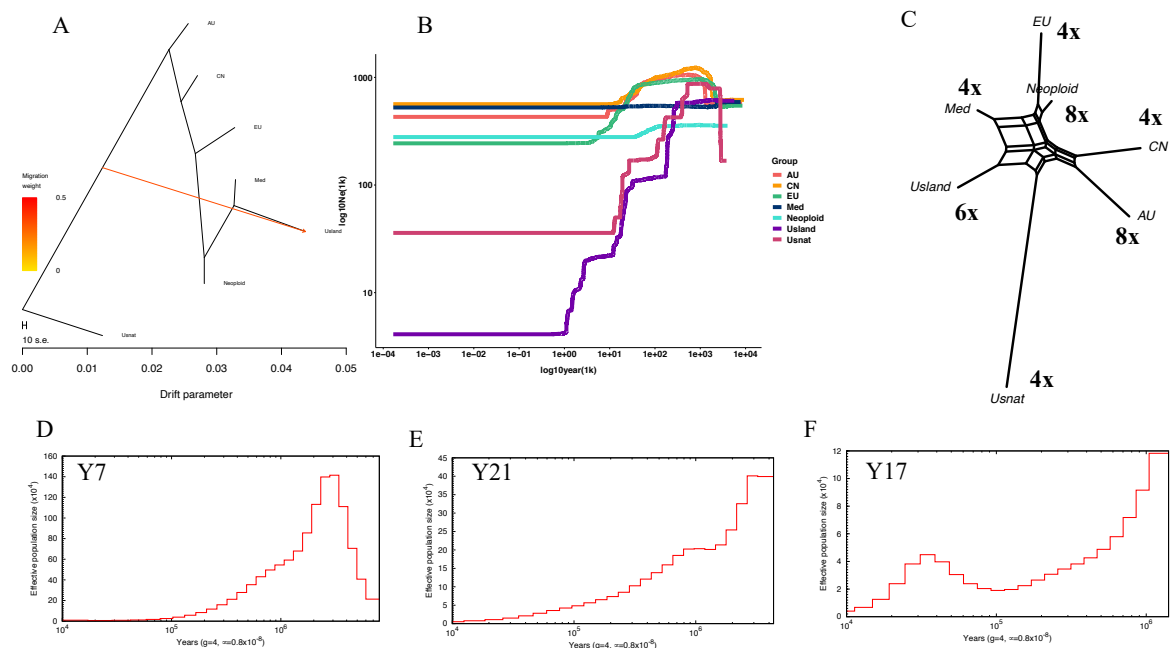

Figure 7 A) Migration events inferred with Treemix. B) Historical effective population sizes of seven *P. australis* lineages estimated with Stairway plot (AU, CN, EU, Med, Neoploid, USland, and USnat). Admixed individuals were excluded from the population analyses, except Neoploid. C) A neighbor net estimated from pairwise divergence times inferred with fastsimcoal2, the numbers indicate the ploidy levels. D-F) Population histories for Y7, Y21 and Y17 inferred using PSMC with mutation rate of  $6.0277 \times 10^{-9}$  substitutions per site per year and generation time of 4 years.

17

### 18 **Hybridization and polyploid diversity**

19 For RADseq data, nucleotide diversity ( $\pi$ ) was estimated to be highest in octoploid AU lineage (0.099908,  
 20  $n=12$ ) and lowest in USnat lineage (0.0207,  $n=3$ ) (Table 6), while other lineages showed intermediate levels

1 of polymorphism ( $\pi$  ranging between 0.067431-0.096761, Table 6). On the other hand, the genome assemblies  
2 yielded low nucleotide diversities of neutral sites ( $\pi_s$ ) for USnat (Y17; 0.001142), Med (Y21; 0.003121), and  
3 higher for USland (Y7; 0.00947) (Table 7). Similar results were obtained for RADseq data when looking at  
4 individuals separately (Table 1). The inbreeding F coefficient was positive for all accessions, being highest  
5 among USnat lineage and lowest in USland lineage, suggesting a higher level of inbreeding in USnat and  
6 relatively more outbreeding in USland, correspondingly (Table 6). Tajima's D value was positive in all  
7 populations, being moderately high in AU ( $0.75 \pm 0.85$ ), EU ( $0.66 \pm 1.03$ ), CN ( $0.575 \pm 0.91$ ), Med ( $0.63 \pm$   
8  $0.98$ ), Neoploid (South Africa) ( $0.81 \pm 0.77$ ) and USnat ( $0.39 \pm 0.94$ ) lineages, and exceptionally high in  
9 USland lineage ( $1.54 \pm 1$ ) (Table 6).

10 Low nucleotide diversity and high Tajima's D are in general hallmarks of a population bottleneck, and we  
11 therefore continued by assessing the population history of the species. Using Stairway plot with the site  
12 frequency spectrum from RADseq data and four years as generation time, an early population increase was  
13 detected between 1-5 Mya for USnat, AU, CN and EU lineages (Fig. 7), followed by a recent decline of  
14 effective population size in nearly all the lineages except Med (Fig. 7B). The decline of AU, CN and EU  
15 populations started from 50Kya. Population of USland dropped dramatically three times with first one at  
16 500Kya, followed by a drop at 40Kya, and 5Kya. USnat started to decrease monotonously from 700Kya.

17 Using the same generation time, PSMC analysis on the genome assemblies showed population decreases  
18 in Med lineage (Y21) starting from around 3 Mya. In USland the decrease started from 1.5 Mya, and in USnat  
19 from 1 Mya, the latter demonstrating a slight increase at 35Kya followed by another decline (Fig. 7 D-F).  
20 Divergence time estimation had showed USland to diverge from Med lineage at 1.34 – 2.68 Mya (Fig. 2C,  
21 Table 9), and the PSMC showed the sharp increase of the population size of USland at around 2.5 Mya (Fig.  
22 7E), indicating the hybridization event may have happened at a suture zone when the population went through  
23 contraction and expansion during glaciation cycles, or then the increase in effective population size merely  
24 reflects the hybridization event and resulting increase in heterozygosity. USnat on the other hand was also  
25 characterized with a population increase at around 5 Mya (Fig. 7B), coincidentally in line with expansion of  
26 North American Prairie in late Miocene, suggesting that the climate cooling and drying may have facilitated  
27 the lineage divergence (Retallack 1997). Towards holocene, the USland and Med populations went through an  
28 acute decline as seen in PSMC and Stairway plots (Fig. 7D, Fig. 7B) and also from the high Tajima's D value  
29 (Table 6).

30

### 31 ***Genetic diversity suggests transitions in reproductive mode***

32 The decline seen in population histories was unexpected, since the population-level diversities were  
33 relatively high, and especially when considering the invasiveness of the expanding EU lineage. We suspected  
34 that the results might reflect a break of self-incompatibility and transition into clonal  
35 propagation, since the transit of reproductive mode strongly affects genetic diversity regarding the mutation  
36 accumulation, allele frequency alteration, and population size changes as time passes. Population genetic  
37 simulations predict that compared to outcrossing and selfing lineages, a clonal lineage experiences relaxed



1 selection and thus accumulates more deleterious mutations resulting in an overall high level of heterozygosity.  
2 However, due to lack of recombination, genotypic diversity in asexual population would be low since  
3 genotypes which have accumulated a high number of deleterious alleles, and therefore have reduced fitness,  
4 would be purged from the population (the phenomenon is known as Muller's ratchet). Additionally, clonal  
5 populations may undergo frequent bottlenecks, since they can colonize habitats with just a few individuals.  
6 Altogether these effects result in effective population decline, hypothesized to lead into an evolutionary dead-  
7 end in the long run (Glemin and Galtier 2012). The predictions have been verified empirically in both animals  
8 and plants, such as *Primula* species (Wang, et al. 2021), stick insects (Bast, et al. 2018), duckweed (Ho, et al.  
9 2019), bdelloid rotifers (Barracough, et al. 2007), and wasps (Tvedte, et al. 2020), to name a few.

10 *P. australis* uses both sexual and asexual reproduction mode. Genome evidence pointed towards frequent  
11 selfing among *Phragmites* populations, since the genome assemblies demonstrated low levels of  
12 heterozygosity and the RAD-seq data yielded high values of inbreeding coefficient. However, seed set rate of  
13 *P. australis* is very low (mean 9.7 -12%) due to its partial self-incompatibility (Tachibana 1984; Ishii and  
14 Kadono 2002), indicating that asexual reproduction may also be playing an important role. In fact, clonal  
15 propagation has been shown to work efficiently in *Phragmites* (Amsberry, et al. 2000; Alvarez, et al. 2005;  
16 Čuda, et al. 2021).

17 Relaxed selection would result in an increased ratio of non-synonymous to synonymous mutations in  
18 asexual and selfing proliferation (Henry, et al. 2012; Lovell, et al. 2017), whereas in outcrossing species  
19 purifying selection would limit the amount of deleterious alleles (Glemin and Galtier 2012). Nucleotide  
20 diversities of deleterious sites ( $\pi_n$ ) were Y17 (0.001417), Y21 (0.002784), Y7 (0.008596) (Table 7), and the  
21 corresponding ratios of non-synonymous to synonymous diversity,  $\pi_n/\pi_s$ , were 1.24 for USnat, 0.89 and 0.91  
22 for Med and USland, respectively. The ratio is very high compared to other plants (Chen, et al. 2017) and  
23 suggests relaxed to no selection on deleterious sites (Johnson and Howard 2007). The USnat lineage had the  
24 highest ratio of nonsynonymous  $\pi_n$  to synonymous  $\pi_s$  (Table 7). The USnat population has long been isolated  
25 from other *Phragmites* lineages, which was also reflected in the high  $F_{st}$  statistic (Table 8). The site-wise  
26 genetic diversity in USnat population is rather high 0.0207 (Table 6) but the heterozygosity of each individual  
27 quite low, suggesting the individuals have accumulated mainly private mutations, complying with the  
28 predictions of clonal lineage, and these alleles may have fixed into homozygosity due to selfing. The overall  
29 diversity is therefore possibly a result of a combination of clonal propagation (high  $\pi_n$ , high population level  
30  $\pi_s$ ), inbreeding (low individual level  $\pi_s$ ), and little gene flow from other *Phragmites* populations (increased  
31  $F_{st}$ ). Therefore, we infer that the secluded USnat lineage may rely even more on clonal propagation than the  
32 other lineages. In fact, it has been found in North America that while the long-distance dispersal of USnat is  
33 facilitated by seedlings, the local growth is mainly proceeding through vegetative propagation (Albert, et al.  
34 2015). The combination of selfing and clonal propagation possibly also explains the sharp decline of effective  
35 population size of USnat since 700Kya (Fig. 7B).

36

## 1 **Discussion**

### 2 ***Intraspecific hybrids give rise to new polyploids at contact zones***

3 Altogether, genetic admixture was commonly seen between the borders of lineages, suggesting low  
4 reproductive barriers among lineages. Neoploid lineages occurring in South Africa and Balkans are derived  
5 from admixture of the tetraploid Med, EU and CN lineages (Fig. 3, Table 3). The neopolyploids are special in  
6 the sense that all the parental lineages are tetraploid, but the resulting offspring are either hexaploids or  
7 octoploids. Three out of four individuals from South Africa are admixed by Med, EU and CN tetraploid  
8 lineages. All the three samples, located far from each other, were predicted to be octoploids (Fig. 1), concordant  
9 with earlier records (Clevering and Lissner 1999).

10 Admixed octoploid individuals were found also in Hungary and Romania, with a slightly different allele  
11 frequency pattern from South African populations (Fig. 5 F-G), suggesting this may be an independent  
12 polyploidization event caused by intraspecies genomic conflicts. Not all admixed individuals had their  
13 chromosomes doubled (Table 3). In fact, only the individuals simultaneously carrying alleles of Med, EU and  
14 CN ancestry had higher ploidy levels. These individuals group within EU lineage in both chloroplast and RAD-  
15 seq genomic phylogeny, implying recursive hybridization with EU lineage after polyploidization. Beyond this  
16 study, other researchers have found octoploids in countries around Mediterranean Sea, including Romania,  
17 Greece, Afganistan, Iran, Algeria, Morocco, Tunisia, France, Spain and previous Yugoslavian area (Gorenflot  
18 1986; Connor, et al. 1998). These regions overlap with the borders of Med and EU lineage, possibly also the  
19 CN lineage, and thus hybridization and polyploidization events are very likely to happen frequently there.  
20 Concordantly, intensive investigation has shown the existence of a mixture of octoploids, tetraploids and  
21 hexaploids in the Danube Delta, likewise inferred to originate from recent polyploidization and hybridization  
22 (Raicu, et al. 1972; Lambertini, Eller, et al. 2012). The hexaploids in Greece and Romania were found to be  
23 admixed individuals with tetraploid ancestors. This is supported from previous studies showing seeds from the  
24 same inflorescence producing offspring of different ploidy levels, suggesting the hexaploidy may be generated  
25 by hybridization of tetraploid and octoploid (Paucă-Comănescu, et al. 1999). The same circumstance occurred  
26 in *Spartina*, where the dodecaploid *S. anglica* resulted from whole genome duplication after the hybridization  
27 of two hexaploid species *S. alterniflora* and *S. maritima*, followed by a recurrent hybridization with coexisting  
28 parental species *S. alterniflora*, giving rise to nonaploid individuals (Renny-Byfield, et al. 2010).

29

### 30 ***Asexual propagation may contribute to genomic conflict***

31 Autopolyploidization and allopolyploidization have been regarded as the main ways of polyploidization,  
32 with the underlying mechanism of how whole genome duplication happens still being largely unknown  
33 (Stuessy and Weiss-Schneeweiss 2019). If the parental species are well diverged, the genomic incompatibility  
34 after hybridization may give more chance of mistakes in meiosis, thus leading to new polyploids. In this study,  
35 neopolyploids were inferred to result as admixture from three lineages of the same species, implying that the  
36 regulation of genomic networks may be broken down. One possibility is frequent misregulation due to stressful  
37 environmental conditions. Extreme environment has been observed as one way to induce polyploidization,

1 especially autopolyploids. One example is the *Brachypodium distachyon* in Iberian Peninsula, where the  
2 distribution of diploids and allotetraploids was significantly associated with the dryness of living environment;  
3 arid environment may cause problems with cytotype segregation and thus enable the polyploidization in  
4 Poaceae species (Manzaneda, et al. 2012). In *P. australis*, the occurrence of octoploids is mainly distributed  
5 in Australia, South Africa, or between Middle Europe and Black Sea, where temperature is high throughout  
6 the year. Thus, the highly stressing, dry and hot climate may have caused errors in meiosis resulting in  
7 unreduced gametes, and the resulting plasticity may have enhanced their ability to adapt to the new ecological  
8 niche (Manzaneda, et al. 2012; Stuessy and Weiss-Schneeweiss 2019). However, this conclusion is  
9 controversial since an experimental study sampling *Brachypodium* species along the aridity gradient in Israel  
10 denied the hypothesis that dryness increases the chance of allopolyploidization (Achenbach, et al. 2012).

11 Since these polyploids were observed mainly along the contact zones, a possible genomic component  
12 contributing to the breakup follows from the extensive clonal propagation in *Phragmites* and the resulting  
13 relaxed selection and accumulation of deleterious alleles. Long term accumulation in allopatric populations  
14 may have led into increased genomic divergence such that intraspecific genomic conflicts arise among progeny  
15 from these diverged populations. This could be due to misregulation during meiosis; since sexual propagation  
16 is of lower importance in a predominantly clonally propagating species, the genes associated with it are not  
17 under strict purifying selection. Taken together, we suggest that decreasing population sizes in *Phragmites*  
18 first led into adopting selfing as propagation strategy. This resulted in further decline of population sizes and  
19 perhaps widespread inbreeding depression, and therefore clonal propagation arose as a solution. The  
20 accumulation of deleterious alleles then eventually results in genome incompatibility and polyploid hybrids  
21 are formed when long diverged populations encounter at contact zones.

22

## 23 **Materials and Methods**

### 24 *DNA extraction, RAD sequencing and whole genome sequencing*

25 A total of 88 *P. australis* individuals were obtained from Eurasian, North American, Oceanian and African  
26 continents (Fig. 1, Table 1) and planted in Aarhus University and Shandong University. Some of the  
27 individuals have already been used in previous phylogeographic studies, and thus we were able to link them  
28 to the defined lineages in other studies (see more in Table 1). One *Arundo donax* (giant reed) individual was  
29 included as outgroup. For RAD sequencing, DNA was extracted from fresh leaves using CTAB method. The  
30 leaves were ground into powder and mixed with 500 µl extraction buffer (containing 100mM Tris pH8, 1.4 M  
31 NaCl, 20mM EDTA, 2% CTAB) and 2% β-mercaptoethanol. After incubation at 65 °C for 10 minutes, the  
32 suspension was mixed with 500 µl of chloroform and spun at 10000 rpm for 5min. Then, 500 µl of chloroform  
33 was added to the supernatant and spun at 10000 rpm for 10 minutes, and finally 800 µl ice cold ethanol was  
34 added. The tube was left in the freezer overnight and subsequently spun at 13000 rpm at 4°C for 20 minutes,  
35 followed by washing with 500 µl 70% ethanol. The pellet was precipitated at 6000rpm at 4 °C, and let dry and  
36 dissolve in 200 µl H<sub>2</sub>O. Paired-end RAD-seq library preparation and sequencing was completed by Shanghai  
37 Honsunbio Limited company (<http://www.honsunbio.com/>), using Illumina HiSeqX10. Whole genome

1 sequences of *Oropetium thomaeum* (genome accession: Phytozome (Goodstein, et al. 2012).), *Oryza sativa*  
2 (genome accession: Phytozome), and *Miscanthus sacchariflorus* (genome assembly accession:  
3 GCA\_002993905.1, NCBI) were used as outgroups. Illumine reads of *Oropetium thomaeum* (SRR2083762),  
4 *Miscanthus sinensis* (SRR486617), *Arundo donax* (SRR4319201), *Arundo plinii* (SRR4319202) and *Sorghum*  
5 *bicolor* (SRR12628364) were used to construct ancestral alleles of *Phragmites* lineages.

6

### 7 *Draft genome assembly*

8 Based on initial analyses with RAD-seq data, we selected three individuals (Y7, Y17, Y21) representing  
9 USland, USnat and Med lineages, respectively, to be sequenced for whole genome assemblies. Following  
10 DNA extraction with CTAB protocol, the genomes were sequenced to 90x high coverage (assuming 1 Gb  
11 genome size) by NovogeAIT at Singapore using Novaseq platform. After receiving the sequencing data, the  
12 genome size was first estimated using Kmergenie (Chikhi and Medvedev 2014). Then, after quality assessment  
13 of the reads using FastQC, the three genomes were assembled using MaSuRCA assembler (Zimin, et al. 2013)  
14 with default settings. The assembly was passed through purge haplotigs v1.0.4 (Roach, et al. 2018b) to remove  
15 the redundant haplotigs resulted from the highly heterozygous regions. The completeness of the genome  
16 assemblies was assessed using BUSCO v5 (Simão, et al. 2015). and odb\_database version 10, and the quality  
17 of the assembly was estimated using Quast (Gurevich, et al. 2013). The draft genome assemblies were next  
18 filtered using Purge Haplotigs pipeline to remove heterozygous genome regions which may have been  
19 accidentally assembled into two haplotigs (Roach, et al. 2018a).

20

### 21 *Gene prediction*

22 Gene prediction for the three draft genome assemblies was performed by combining homology - based method  
23 and *ab initio* methods. The draft genomes were then searched against the Poaceae grasses *O. thomaeum* and  
24 *M. sinensis* to obtain the annotation information based on homology prediction. *Ab initio* gene prediction was  
25 performed using GeneMark-ES (Lomsadze, et al. 2005), BRAKER2 (Hoff, et al. 2018), PASA (Haas, et al.  
26 2011) and AUGUSTUS (Stanke, et al. 2008). RNAseq data of *P. australis* was obtained from NCBI (accession  
27 number: SAMN04544298), aligned to each draft assemblies by STAR aligner (Dobin, et al. 2013), and used  
28 as evidence to define intron borders in BRAKER2 prediction. In addition, the RNAseq data was also assembled  
29 *de novo* using TRINITY (Grabherr, et al. 2011) and used in PASA for generating a high quality dataset for  
30 downstream *ab initio* gene predictions. Finally, all evidence of gene prediction was combined in  
31 EvidenceModeler (Haas, et al. 2008) to get consensus gene model predictions. The completeness of predicted  
32 gene models was assessed using BUSCO by searching against poales\_odb10 protein database. Significance of  
33 overlap between duplicated BUSCOs in different genome assemblies were tested with Fisher's exact test using  
34 R package "GeneOverlap"(Shen 2014).

35

### 36 *Syntenic blocks and divergence of subgenomes*

1 The three draft genomes were each aligned against *O. thomaeum* genome (Genome ID 51527 in CoGe database,  
2 <https://genomeevolution.org/coge>) using SynMap tool in CoGe (Lyons and Freeling 2008) that identifies  
3 syntenic blocks. The Ks (synonymous substitutions rate) rates for the syntenic genes were then downloaded  
4 from CoGe and syntenic blocks were phased into two subgenomes based on the average Ks values throughout  
5 the block.

6 To date the time of WGD in relation to speciation, we inspected BUSCO genes that were present in rice (*O.*  
7 *sativa*), *O. thomaeum*, Y7, Y17 and Y21. *Oryza sativa* and *O. thomaeum* were used as outgroups. For  
8 polyploids, multi-copy genes sourced from several polyploidizations often result in incongruent phylogeny.  
9 Single copy orthologs are better choice to reflect the species evolution due to less complicated history, and  
10 allopolyploidization events could be traced by analyzing the two copies of paralogous gene sets belonging to  
11 their own parental species (Brysting, et al. 2011). Following this idea, we used the BUSCOs which were  
12 present as a single copy in the outgroups and duplicated in Y7, Y17 and Y21 to find out the divergence time  
13 of the subgenomes. These BUSCOs were considered to be the orthologs in all species, but paralogs in  
14 *Phragmites* species, representing the two ancestral subgenomes. In total 580 such BUSCOs among *O. sativa*,  
15 *O. thomaeum* and *Phragmites* lineages were obtained. From this set, we randomly selected 25 BUSCOs which  
16 showed coherent topology with species tree and estimated divergence time of *Phragmites* subgenomes using  
17 BEAST2 with calibrated Yule model. A site model of HKY+Gamma was used, with four categories of Gamma  
18 distribution, and the molecular clock was set to be random local clock which allows certain variation of clock  
19 rate among lineages. Based on fossil record in Oryzae and calibration point of BOP and PACMAD lineages  
20 (Prasad, et al. 2011; Christin, et al. 2014), we set the 95% confidence interval of total most recent common  
21 ancestor (tmrca) to be 65.6 -73.1Mya, by assigning a lognormal prior, with an offset 65.0, a mean of 3.0, and  
22 a standard deviation of 0.8 (Mean In Real Space). The total MCMC sampling chain length was 10 million  
23 iterations, and the states were stored every 5000 samples. The divergence estimation was run twice with the  
24 same parameter to guarantee the convergence, with each run achieving ESS value of all parameters to be higher  
25 than 200.

#### 26 27 *Identification of putative deleterious mutations*

28 The nucleotide diversities of neutral and deleterious sites were calculated following the procedure in  
29 <https://github.com/jsalojar/PiNSiR>. Briefly, the short reads of Y17, Y21 and Y7 were aligned to their own  
30 draft genome using bwa mem to obtain the variants along the genome, sorted with Samtools (Li, et al. 2009),  
31 and genome coverage variants were called using bcftools (Li, et al. 2009). Site-wise diversities were estimated  
32 using ANGSD (Korneliussen, et al. 2014) and used as input in the R package PiNSiR. The ratio of  
33 nonsynonymous/synonymous mutations of each subgenome was performed using the same method and  
34 estimating the diversity using the coordinates of the syntenic regions with *O. thomaeum*.

#### 35 36 *Variant calling*

1 RAD-tag sequences were processed following Stacks pipeline refmap methods by aligning the reads to the  
2 reference genome Y17 (Catchen, et al. 2013). We first demultiplexed the reads and removed the barcode using  
3 `process_radtags`. In the refmap pipeline, the paired reads were aligned to Y17 assembly representing USnat  
4 lineage using Bowtie2 (Langmead and Salzberg 2012). The RAD-seq data was also aligned to the already  
5 published chloroplast assembly (accession number: KJ825856), so as to draw the genetic information carried  
6 by organelles, and to compare the evolutionary history between nuclear and chloroplast genome.

### 7 8 *Ploidy level prediction*

9 Although the ploidy level of most individuals was known from flow cytometry, the knowledge of genome size  
10 of all individuals would give a clearer picture about the evolutionary path of polyploidization. To find the link  
11 between genomic alleles and ploidy levels, we developed a method that predicts ploidy level by counting the  
12 proportions of alternative alleles based on the reference guided aligned reads. After mapping the short reads  
13 to the reference genome, similarly but differently from ploidyNGS (dos Santos, et al. 2016), we count the  
14 number of alleles that are different from the reference genome, by setting the total read coverage to range from  
15 20 to 200, only alleles with coverage higher than 7 were considered as variants. The number of chromosome  
16 copies were predicted by counting the number of peaks of alternative alleles. For example, in diploids  
17 harboring two copies of alleles, the proportion of reads supporting alternative alleles would be around 0.5 in  
18 heterozygous sites, and thus the genomic distribution of the proportion of reads supporting alternative alleles  
19 should demonstrate a single peak at 0.5. Similarly, for a tetraploid individual, the alternative allele proportion  
20 should show peaks at 0.25, 0.5, 0.75, and at 0.167, 0.33, 0.5, 0.67 and, 0.83 in hexaploids etc. Based on this  
21 pattern, we predicted the ploidy levels by plotting the density of alternative allele frequency, and verified the  
22 predictions using the flow cytometry data. We performed the analysis by counting the read depth of alternative  
23 alleles in bam files after aligning the filtered reads to the reference genome Y17.

### 24 25 *Phylogeny*

26 For further analyses a filtered set of high quality SNPs was obtained by selecting SNPs that are present in >90%  
27 of the samples using `vcftools` (Danecek, et al. 2011). Phylogeny was estimated for the set of filtered SNPs  
28 using RAxML (Stamatakis 2006) under the GTRGAMMA substitution model with 100 bootstrap replicates.  
29 The final tree was annotated and viewed in Figtree (<http://tree.bio.ed.ac.uk/software/figtree/>). Variants from  
30 chloroplast were also used for estimating the phylogenetic tree using same methods.

### 31 32 *Population structure and reticulate evolution*

33 The population structure was estimated on the whole dataset using fastSTRUCTURE with K ranging between  
34 1...15 (Raj, et al. 2014), best K was selected by the highest marginal likelihood. To further evaluate the genetic  
35 ancestry of each independent allele, we reduce the effect of linkage disequilibrium by selecting a random SNP  
36 from each stacks loci, and removing ninety percent of the missing data were removed using `vcftools v 0.1.16`  
37 (Danecek, et al. 2011), and filtered out the data with minor allele frequency less than 0.05 using Plink 1.9

1 (Purcell, et al. 2007). The processed data was used to performed genetic clustering using fineRADstructure  
2 (Malinsky, et al. 2018).

3 Principal component analysis (PCA) was calculated using Plink 1.9 (Purcell, et al. 2007) and plotted in R  
4 to reveal the ordination of the genetic data. In addition, we performed Redundancy Analysis (RDA) using R  
5 package “vegan” (Oksanen, et al. 2010) to quantify the proportion of the genetic variation explained by  
6 covariates such as different lineages, geographical location and ploidy level, with 100 permutations to assess  
7 the importance of fitted models.

8 To understand the genomic structure of each lineage, we grouped individuals to populations based on  
9 fastSTRUCTURE and phylogeny results (Table 4). Inbreeding  $F$  coefficients of each individual were  
10 calculated using Plink v1.07 (Purcell, et al. 2007), and group mean and standard deviation group were  
11 measured. Nucleotide diversity ( $\pi$ ), private alleles ( $N_A$ ) and genetic divergence between populations ( $F_{st}$  and  
12  $d_{xy}$ ) were calculated using populations program in Stacks (Rochette, et al. 2019).  $F$  coefficient for each  
13 individual was calculated using Plink 1.9 (Purcell, et al. 2007), and the nucleotide diversity ( $\pi$ ) of each  
14 individual was measured using vcftools v 0.1.16 with 1000bp window size (Danecek, et al. 2011). To test for  
15 admixture, we performed  $f_3$  tests using Admixtools 2 (Patterson, et al. 2012). ABBABABA were considered  
16 to be significant only when the absolute value of  $Z$  score is higher than 3. To test the potential gene flow  
17 between lineages, we selected four pure individuals from each lineage (except for USnat lineage where one  
18 individual was used as an outgroup) and performed ABBABABA statistics among all combinations using  
19 AdmixTools v7.0.1 (Patterson, et al. 2012). Tajima’s  $D$  of each population was measured using vcfkit (Cook  
20 and Andersen 2017) using non-overlapping sliding windows of size 10,000 bp to infer whether population  
21 demographics has been heterogenous along the genome.

22

### 23 *Population demographics in history*

24 Site frequency spectrum (SFS) of derived alleles were used in Stairway plot (Liu and Fu 2015) to infer the  
25 historical population size changes. To further validate our inference about demographic changes, we aligned  
26 the reads of the three whole-genome-sequenced individuals to their own reference genome using bwa (Li and  
27 Durbin 2009), and performed demographic analysis using PSMC (Li and Durbin 2012). Although it usually  
28 takes 1 year for *P. australis* to sprout and mature (Phragmites resource, 1989:15), we set the generation time  
29 to 2-4 years because it is perennial. We set the mutation rate to be the Poaceae silent-site mutation rate,  
30  $6.0277e-09$  substitutions per site per year (De La Torre, et al. 2017). Number of migration events between *P.*  
31 *australis* lineages were tested using Treemix (Pickrell and Pritchard 2012). All pure individuals belonging to  
32 the lineages were included in the analysis, and SNPs were filtered to only include the ones that appear in all  
33 populations. We analyzed 1- 5 migration events, and each scenario was tested with 5 replicates. The optimal  
34 number of migration were determined using R package “optM” based on the second-order rate of change in  
35 likelihood (RRs 2019).

36 To determine the derived alleles in *Phragmites* species, we aligned the genome reads of *O. thomaeum*, *A.*  
37 *donax*, *A. plinii*, *S. bicolor* and *M. sinensis* to Y17 using bwa mem, and then obtained consensus ancestral

1 genome using ANGSD (Korneliussen, et al. 2014). Ancestral alleles of the variants called by refmap pipeline  
2 were called and annotated using samtools and bcftools. The multidimensional unfolded Site Frequency  
3 Spectrum (SFS) for all seven lineages was calculated using easySFS program  
4 (<https://github.com/isaacovercast/easySFS>). We selected the optimal projection by balancing the number of  
5 segregating sites and adequate number of individuals, resulting between 933 and 2895 segregating sites per  
6 population group. The parameters with regard to population splitting were estimated with fastsimcoal version  
7 2.6(Excoffier, et al. 2013), and mainly focused on the divergence time between populations. In each cycle, the  
8 program run for 200,000 iterations to estimate the expected SFS and conduct 40 optimization (ECM) cycles  
9 to estimate the parameters. To find the best fitting parameter, we performed 100 runs for each scenario, and  
10 selected the best run by the highest likelihood. We used a mutation rate of  $6.0277E^{-09}$  site/year (De La Torre,  
11 et al. 2017) as a standard, assuming two to four years of generation time for *Phragmites* species. The results  
12 were visualized using neighborNet available in R package Phangorn.

13

#### 14 **Acknowledgements**

15 This work was supported by International Postdoctoral Exchange Fellowship Program of China Postdoctoral  
16 Science Foundation (C.W.), the National Natural Science Foundation of China (Grant No. 31770361 to WH.  
17 G, Grant No. 31800299 to T. W., and Nanyang Technological University startup grant and Academy of Finland  
18 (decisions 318288 and 319947) to J.S. We would like to thank Pasi Rastas for providing the script to calculate  
19 alternative allele count, Sitaram Rajaraman for sharing the work pipeline of genome annotation, and Carla  
20 Lambertini for the help of geographic coordinates corrections. Finally, we want to acknowledge CSC–IT  
21 Center for Science, Finland, and NTU HPCC, Singapore, for computational resources.

22

#### 23 **Data Availability Statements**

24 The data underlying this article are available in NCBI SRA database and can be accessed with the BioProject  
25 ID PRJNA753984.

26

#### 27 **Author Contributions**

28 C.W., WH.G. and J.S. conceived the study; H.B., LL.L., F.E. and T.W. maintained and collected the samples  
29 as well as provided sampling information; C.W., LL.L. and MQ.Y. performed DNA extraction; C.W. and J.S.  
30 lead the data analysis; C.W. and J.S. wrote the paper with input from WH.G., LL.L., F.E., H.B., T.W., and  
31 MQ.Y.

32

#### 33 **Competing Interests statement**

34 The authors declared no competing interests.

35

#### 36 **References**



- 1 Abdeddaim-Boughanmi K, Garnatje T, Vitales D, Brown SC, Kaïd-Harche M, Siljak-Yakovlev S. 2019. A single  
2 species, two basic chromosomal numbers: case of *Lygeum spartum* (Poaceae). *Plant Biosystems-An*  
3 *International Journal Dealing with all Aspects of Plant Biology* 153:775-783.
- 4 Achenbach L, Lambertini C, Brix H. 2012. Phenotypic traits of *Phragmites australis* clones are not related to  
5 ploidy level and distribution range. *AoB plants* 2012.
- 6 Albert A, Brisson J, Belzile F, Turgeon J, Lavoie C. 2015. Strategies for a successful plant invasion: the  
7 reproduction of *Phragmites australis* in north-eastern North America. *Journal of Ecology* 103:1529-1537.
- 8 Alix K, Gérard PR, Schwarzacher T, Heslop-Harrison J. 2017. Polyploidy and interspecific hybridization:  
9 partners for adaptation, speciation and evolution in plants. *Annals of botany* 120:183-194.
- 10 Alvarez MG, Tron F, Mauchamp A. 2005. Sexual versus asexual colonization by *Phragmites australis*: 25-year  
11 reed dynamics in a Mediterranean marsh, southern France. *Wetlands* 25:639-647.
- 12 Amsberry L, Baker MA, Ewanchuk PJ, Bertness MD. 2000. Clonal integration and the expansion of  
13 *Phragmites australis*. *Ecological applications* 10:1110-1118.
- 14 An JX, Wang Q, Yang J, LIU JQ. 2012. Phylogeographic analyses of *Phragmites australis* in China: native  
15 distribution and habitat preference of the haplotype that invaded North America. *Journal of Systematics*  
16 *and Evolution* 50:334-340.
- 17 Augusto Corrêa dos Santos R, Goldman GH, Riaño-Pachón DM. 2017. ploidyNGS: visually exploring ploidy  
18 with Next Generation Sequencing data. *Bioinformatics* 33:2575-2576.
- 19 Barraclough TG, Fontaneto D, Ricci C, Herniou EA. 2007. Evidence for inefficient selection against  
20 deleterious mutations in cytochrome oxidase I of asexual bdelloid rotifers. *Molecular biology and evolution*  
21 24:1952-1962.
- 22 Bast J, Parker DJ, Dumas Z, Jalvingh KM, Tran Van P, Jaron KS, Figuet E, Brandt A, Galtier N, Schwander T.  
23 2018. Consequences of asexuality in natural populations: insights from stick insects. *Molecular biology and*  
24 *evolution* 35:1668-1677.
- 25 Brysting AK, Fay MF, Leitch IJ, Aiken SG. 2004. One or more species in the arctic grass genus *Dupontia*?—a  
26 contribution to the Panarctic Flora project. *Taxon* 53:365-382.
- 27 Brysting AK, Mathiesen C, Marcussen T. 2011. Challenges in polyploid phylogenetic reconstruction: A case  
28 story from the arctic-alpine *Cerastium alpinum* complex. *Taxon* 60:333-347.
- 29 Canavan K, Paterson ID, Lambertini C, Hill MP. 2018. Expansive reed populations—alien invasion or  
30 disturbed wetlands? *AoB plants* 10:ply014.
- 31 Capblancq T, Luu K, Blum MG, Bazin E. 2018. Evaluation of redundancy analysis to identify signatures of  
32 local adaptation. *Molecular ecology resources* 18:1223-1233.
- 33 Catchen J, Hohenlohe PA, Bassham S, Amores A, Cresko WA. 2013. Stacks: an analysis tool set for  
34 population genomics. *Molecular Ecology* 22:3124-3140.

- 1 Chen J, Glémin S, Lascoux M. 2017. Genetic diversity and the efficacy of purifying selection across plant and  
2 animal species. *Molecular biology and evolution* 34:1417-1428.
- 3 Chikhi R, Medvedev P. 2014. Informed and automated k-mer size selection for genome assembly.  
4 *Bioinformatics* 30:31-37.
- 5 Christin P-A, Spriggs E, Osborne CP, Strömberg CA, Salamin N, Edwards EJ. 2014. Molecular dating,  
6 evolutionary rates, and the age of the grasses. *Systematic biology* 63:153-165.
- 7 Clevering OA, Lissner J. 1999. Taxonomy, chromosome numbers, clonal diversity and population dynamics  
8 of *Phragmites australis*. *Aquatic Botany* 64:185-208.
- 9 Colin R, Eguiarte LE. 2016. Phylogeographic analyses and genetic structure illustrate the complex  
10 evolutionary history of *Phragmites australis* in Mexico. *American Journal of Botany* 103:876-887.
- 11 Connor H, Dawson M, Keating R, Gill L. 1998. Chromosome numbers of *Phragmites australis* (Arundineae:  
12 Gramineae) in New Zealand. *New Zealand Journal of Botany* 36:465-469.
- 13 Cook DE, Andersen EC. 2017. VCF-kit: assorted utilities for the variant call format. *Bioinformatics* 33:1581-  
14 1582.
- 15 Čuda J, Skálová H, Meyerson LA, Pyšek P. 2021. Regeneration of *Phragmites australis* from rhizome and  
16 culm fragments: an experimental test of environmental effects, population origin and invasion status.  
17 *PRESLIA* 93:237-254.
- 18 Danecek P, Auton A, Abecasis G, Albers CA, Banks E, DePristo MA, Handsaker RE, Lunter G, Marth GT,  
19 Sherry ST. 2011. The variant call format and VCFtools. *Bioinformatics* 27:2156-2158.
- 20 De La Torre AR, Li Z, Van de Peer Y, Ingvarsson PK. 2017. Contrasting rates of molecular evolution and  
21 patterns of selection among gymnosperms and flowering plants. *Molecular biology and evolution* 34:1363-  
22 1377.
- 23 DeGiorgio M, Jakobsson M, Rosenberg NA. 2009. Explaining worldwide patterns of human genetic variation  
24 using a coalescent-based serial founder model of migration outward from Africa. *Proceedings of the*  
25 *National Academy of Sciences* 106:16057-16062.
- 26 Dobin A, Davis CA, Schlesinger F, Drenkow J, Zaleski C, Jha S, Batut P, Chaisson M, Gingeras TR. 2013. STAR:  
27 ultrafast universal RNA-seq aligner. *Bioinformatics* 29:15-21.
- 28 dos Santos RAC, Goldman GH, Riaño-Pachón DM. 2016. ploidyNGS: Visually exploring ploidy with next  
29 generation sequencing data. *bioRxiv:086488*.
- 30 Estep MC, McKain MR, Diaz DV, Zhong J, Hodge JG, Hodkinson TR, Layton DJ, Malcomber ST, Pasquet R,  
31 Kellogg EA. 2014. Allopolyploidy, diversification, and the Miocene grassland expansion. *Proceedings of the*  
32 *National Academy of Sciences* 111:15149-15154.
- 33 Excoffier L, Dupanloup I, Huerta-Sánchez E, Sousa VC, Foll M. 2013. Robust demographic inference from  
34 genomic and SNP data. *PLoS Genet* 9:e1003905.

- 1 Glemin S, Galtier N. 2012. Genome evolution in outcrossing versus selfing versus asexual species.  
2 *Evolutionary Genomics*:311-335.
- 3 Godfree RC, Marshall DJ, Young AG, Miller CH, Mathews S. 2017. Empirical evidence of fixed and  
4 homeostatic patterns of polyploid advantage in a keystone grass exposed to drought and heat stress. *Royal  
5 Society open science* 4:170934.
- 6 Goodstein DM, Shu S, Howson R, Neupane R, Hayes RD, Fazo J, Mitros T, Dirks W, Hellsten U, Putnam N.  
7 2012. Phytozome: a comparative platform for green plant genomics. *Nucleic acids research* 40:D1178-  
8 D1186.
- 9 Gorenflot R. 1986. Degres et niveaux de la variation du nombre chromosomique chez *Phragmites australis*  
10 (Cav.) Trin. ex Steud. Veroff. *Geobot. Inst. ETH, Stiftung Rubel, Zurich* 87:53-65.
- 11 Grabherr MG, Haas BJ, Yassour M, Levin JZ, Thompson DA, Amit I, Adiconis X, Fan L, Raychowdhury R, Zeng  
12 Q. 2011. Trinity: reconstructing a full-length transcriptome without a genome from RNA-Seq data. *Nature  
13 biotechnology* 29:644.
- 14 Greuter W, Scholz H. 1996. *Phragmites* in Crete, *Cenchrus frutescens*, and the nomenclature of the  
15 common reed (Gramineae). *Taxon* 45:521-523.
- 16 Gurevich A, Saveliev V, Vyahhi N, Tesler G. 2013. QUAST: quality assessment tool for genome assemblies.  
17 *Bioinformatics* 29:1072-1075.
- 18 Haas BJ, Salzberg SL, Zhu W, Pertea M, Allen JE, Orvis J, White O, Buell CR, Wortman JR. 2008. Automated  
19 eukaryotic gene structure annotation using EVIDENCEModeler and the Program to Assemble Spliced  
20 Alignments. *Genome biology* 9:R7.
- 21 Haas BJ, Zeng Q, Pearson MD, Cuomo CA, Wortman JR. 2011. Approaches to fungal genome annotation.  
22 *Mycology* 2:118-141.
- 23 Hardion L, Verlaque R, Vorontsova MS, Combroux I, Chen C-W, Takamizo T, Vila B. 2017. Does infraspecific  
24 taxonomy match species evolutionary history? A phylogeographic study of *Arundo formosana* (Poaceae).  
25 *Botanical Journal of the Linnean Society* 183:236-249.
- 26 Henry L, Schwander T, Crespi BJ. 2012. Deleterious mutation accumulation in asexual *Timema* stick insects.  
27 *Molecular biology and evolution* 29:401-408.
- 28 Hewitt GM. 1996. Some genetic consequences of ice ages, and their role in divergence and speciation.  
29 *Biological Journal of the Linnean Society* 58:247-276.
- 30 Ho EK, Bartkowska M, Wright SI, Agrawal AF. 2019. Population genomics of the facultatively asexual  
31 duckweed *Spirodela polyrhiza*. *New Phytologist* 224:1361-1371.
- 32 Hoff KJ, Lomsadze A, Stanke M, Borodovsky M. 2018. BRAKER2: incorporating protein homology  
33 information into gene prediction with GeneMark-EP and AUGUSTUS. *Plant and Animal Genomes XXVI*.
- 34 Ishii J, Kadono Y. 2002. Factors influencing seed production of *Phragmites australis*. *Aquatic Botany* 72:129-  
35 141.

- 1    Israels AZ. 1984. Redundancy analysis for qualitative variables. *Psychometrika* 49:331-346.
- 2    Johnson SG, Howard RS. 2007. Contrasting patterns of synonymous and nonsynonymous sequence  
3    evolution in asexual and sexual freshwater snail lineages. *Evolution: International Journal of Organic*  
4    *Evolution* 61:2728-2735.
- 5    Jones N, Pašakinskienė I. 2005. Genome conflict in the gramineae. *New Phytologist* 165:391-410.
- 6    Korneliusson TS, Albrechtsen A, Nielsen R. 2014. ANGSD: analysis of next generation sequencing data. *BMC*  
7    *bioinformatics* 15:1-13.
- 8    Lambertini C. 2019. Why are tall-statured energy grasses of polyploid species complexes potentially  
9    invasive? A review of their genetic variation patterns and evolutionary plasticity. *Biological Invasions*:1-23.
- 10   Lambertini C, Eller FP, Achenbach L, Nguyen L, Guo W-Y, Brix H editors. *International Conference*  
11   *Proceedings: Water Resources and Wetlands*. 2012.
- 12   Lambertini C, Guo W-Y, Ye S, Eller F, Guo X, Li X-Z, Sorrell BK, Speranza M, Brix H. 2020. Phylogenetic  
13   diversity shapes salt tolerance in *Phragmites australis* estuarine populations in East China. *Scientific Reports*  
14   10:1-12.
- 15   Lambertini C, Gustafsson M, Frydenberg J, Lissner J, Speranza M, Brix H. 2006. A phylogeographic study of  
16   the cosmopolitan genus *Phragmites* (Poaceae) based on AFLPs. *Plant Systematics and Evolution* 258:161-  
17   182.
- 18   Lambertini C, Mendelssohn IA, Gustafsson MH, Olesen B, Riis T, Sorrell BK, Brix H. 2012. Tracing the origin  
19   of Gulf Coast *Phragmites* (Poaceae): A story of long-distance dispersal and hybridization. *American Journal*  
20   *of Botany* 99:538-551.
- 21   Langmead B, Salzberg SL. 2012. Fast gapped-read alignment with Bowtie 2. *Nature methods* 9:357.
- 22   Levy AA, Feldman M. 2002. The impact of polyploidy on grass genome evolution. *Plant physiology*  
23   130:1587-1593.
- 24   Li H, Durbin R. 2009. Fast and accurate short read alignment with Burrows–Wheeler transform.  
25   *Bioinformatics* 25:1754-1760.
- 26   Li H, Durbin R. 2012. Inference of human population history from whole genome sequence of a single  
27   individual. *Nature* 475:493.
- 28   Li H, Handsaker B, Wysoker A, Fennell T, Ruan J, Homer N, Marth G, Abecasis G, Durbin R. 2009. The  
29   sequence alignment/map format and SAMtools. *Bioinformatics* 25:2078-2079.
- 30   Liu L, Pei C, Liu S, Guo X, Du N, Guo W. 2018. Genetic and epigenetic changes during the invasion of a  
31   cosmopolitan species (*Phragmites australis*). *Ecology and evolution* 8:6615-6624.
- 32   Liu LL, Yin MQ, Guo X, Wang JW, Cai YF, Wang C, Yu XN, Du N, Brix H, Eller F. 2020. Cryptic lineages and  
33   potential introgression in a mixed-ploidy species (*Phragmites australis*) across temperate China. *Journal of*  
34   *Systematics and Evolution*.

- 1 Liu X, Fu Y-X. 2015. Exploring population size changes using SNP frequency spectra. *Nature genetics* 47:555.
- 2 Lomsadze A, Ter-Hovhannisyan V, Chernoff YO, Borodovsky M. 2005. Gene identification in novel  
3 eukaryotic genomes by self-training algorithm. *Nucleic acids research* 33:6494-6506.
- 4 Lovell JT, Williamson RJ, Wright SI, McKay JK, Sharbel TF. 2017. Mutation accumulation in an asexual  
5 relative of *Arabidopsis*. *PLoS genetics* 13:e1006550.
- 6 Lyons E, Freeling M. 2008. How to usefully compare homologous plant genes and chromosomes as DNA  
7 sequences. *The Plant Journal* 53:661-673.
- 8 Malinsky M, Trucchi E, Lawson DJ, Falush D. 2018. RADpainter and fineRADstructure: population inference  
9 from RADseq data. *Molecular biology and evolution* 35:1284-1290.
- 10 Manzaneda AJ, Rey PJ, Bastida JM, Weiss-Lehman C, Raskin E, Mitchell-Olds T. 2012. Environmental aridity  
11 is associated with cytotype segregation and polyploidy occurrence in *Brachypodium distachyon* (Poaceae).  
12 *New Phytologist* 193:797-805.
- 13 Margarido GR, Heckerman D. 2015. ConPADE: genome assembly ploidy estimation from next-generation  
14 sequencing data. *PLoS Comput Biol* 11:e1004229.
- 15 Meyerson LA, Lambertini C, McCormick MK, Whigham DF. 2012. Hybridization of common reed in North  
16 America? The answer is blowing in the wind. *AoB plants* 2012.
- 17 Nguyen LX, Lambertini C, Sorrell BK, Eller F, Achenbach L, Brix H. 2013. Photosynthesis of co-existing  
18 *Phragmites* haplotypes in their non-native range: are characteristics determined by adaptations derived  
19 from their native origin? *AoB plants* 5.
- 20 Oksanen J, Blanchet FG, Kindt R, Legendre P, O'hara R, Simpson GL, Solymos P, Stevens MHH, Wagner H.  
21 2010. *Vegan*: community ecology package. R package version 1.17-4. <http://cran.r-project.org>>. *Acesso*  
22 *em* 23:2010.
- 23 Patterson N, Moorjani P, Luo Y, Mallick S, Rohland N, Zhan Y, Genschoreck T, Webster T, Reich D. 2012.  
24 Ancient admixture in human history. *Genetics* 192:1065-1093.
- 25 Paucă-Comănescu M, Clevering OA, Hanganu J, Gridin M. 1999. Phenotypic differences among ploidy levels  
26 of *Phragmites australis* growing in Romania. *Aquatic Botany* 64:223-234.
- 27 Peterson KSPM, Soreng RJ. 2004. Recognition of *Phragmites australis* subsp. *americanus* (Poaceae:  
28 Arundinoideae) in North America: Evidence from morphological and genetic analyses. *Sida* 21:683-692.
- 29 Pickrell J, Pritchard J. 2012. Inference of population splits and mixtures from genome-wide allele frequency  
30 data. *Nature Precedings*:1-1.
- 31 Pound MJ, Haywood AM, Salzmann U, Riding JB, Lunt DJ, Hunter SJ. 2011. A Tortonian (late Miocene,  
32 11.61–7.25 Ma) global vegetation reconstruction. *Palaeogeography, palaeoclimatology, palaeoecology*  
33 300:29-45.

- 1 Prasad V, Strömberg C, Leaché A, Samant B, Patnaik R, Tang L, Mohabey D, Ge S, Sahni A. 2011. Late  
2 Cretaceous origin of the rice tribe provides evidence for early diversification in Poaceae. *Nature*  
3 *communications* 2:1-9.
- 4 Purcell S, Neale B, Todd-Brown K, Thomas L, Ferreira MA, Bender D, Maller J, Sklar P, De Bakker PI, Daly MJ.  
5 2007. PLINK: a tool set for whole-genome association and population-based linkage analyses. *The American*  
6 *journal of human genetics* 81:559-575.
- 7 Pyšek P, Skálová H, Čuda J, Guo WY, Suda J, Doležal J, Kauzál O, Lambertini C, Lučanová M, Mandáková T.  
8 2018. Small genome separates native and invasive populations in an ecologically important cosmopolitan  
9 grass. *Ecology* 99:79-90.
- 10 Raicu P, Staicu S, Stoian V, Roman T. 1972. The *Phragmites communis* Trin. chromosome complement in  
11 the Danube delta. *Hydrobiologia* 39:83-89.
- 12 Raj A, Stephens M, Pritchard JK. 2014. fastSTRUCTURE: variational inference of population structure in large  
13 SNP data sets. *Genetics* 197:573-589.
- 14 Renny-Byfield S, Ainouche M, Leitch IJ, Lim KY, Le Comber SC, Leitch AR. 2010. Flow cytometry and GISH  
15 reveal mixed ploidy populations and *Spartina* nonaploids with genomes of *S. alterniflora* and *S. maritima*  
16 origin. *Annals of botany* 105:527-533.
- 17 Retallack GJ. 1997. Neogene expansion of the North American prairie. *Palaios* 12:380-390.
- 18 Roach MJ, Schmidt SA, Borneman AR. 2018a. Purge Haplotigs: allelic contig reassignment for third-gen  
19 diploid genome assemblies. *BMC bioinformatics* 19:460.
- 20 Roach MJ, Schmidt SA, Borneman AR. 2018b. Purge Haplotigs: allelic contig reassignment for third-gen  
21 diploid genome assemblies. *BMC bioinformatics* 19:1-10.
- 22 Rochette NC, Rivera-Colón AG, Catchen JM. 2019. Stacks 2: Analytical methods for paired-end sequencing  
23 improve RADseq-based population genomics. *Molecular Ecology* 28:4737-4754.
- 24 RRs F. 2019. optM: an R package to optimize the number of migration edges using threshold models.  
25 *Journal of Heredity*.
- 26 Salojärvi J, Smolander O-P, Nieminen K, Rajaraman S, Safronov O, Safdari P, Lamminmäki A, Immanen J, Lan  
27 T, Tanskanen J. 2017. Genome sequencing and population genomic analyses provide insights into the  
28 adaptive landscape of silver birch. *Nature genetics* 49:904-912.
- 29 Salse J, Bolot S, Throude M, Jouffe V, Piegu B, Quraishi UM, Calcagno T, Cooke R, Delseny M, Feuillet C.  
30 2008. Identification and characterization of shared duplications between rice and wheat provide new  
31 insight into grass genome evolution. *The Plant Cell* 20:11-24.
- 32 Saltonstall K. 2002. Cryptic invasion by a non-native genotype of the common reed, *Phragmites australis*,  
33 into North America. *Proceedings of the National Academy of Sciences* 99:2445-2449.

- 1 Saltonstall K. 2003. Microsatellite variation within and among North American lineages of *Phragmites*  
2 *australis*. *Molecular Ecology* 12:1689-1702.
- 3 Saltonstall K. 2016. The naming of *Phragmites* haplotypes. *Biological Invasions* 18:2433-2441.
- 4 Saltonstall K, Peterson PM, Soreng RJ. 2004. RECOGNITION OF *PHRAGMITES AU STRAUS* SUBSP.  
5 *AMERICANUS* (POACEAE: ARUNDINOIDEAE) IN NORTH AMERICA: EVIDENCE FROM MORPHOLOGICAL AND  
6 GENETIC ANALYSES. *SIDA, Contributions to Botany*:683-692.
- 7 Shen L. 2014. GeneOverlap: An R package to test and visualize gene overlaps. R Package.
- 8 Simão FA, Waterhouse RM, Ioannidis P, Kriventseva EV, Zdobnov EM. 2015. BUSCO: assessing genome  
9 assembly and annotation completeness with single-copy orthologs. *Bioinformatics* 31:3210-3212.
- 10 Stamatakis A. 2006. RAxML-VI-HPC: maximum likelihood-based phylogenetic analyses with thousands of  
11 taxa and mixed models. *Bioinformatics* 22:2688-2690.
- 12 Stanke M, Diekhans M, Baertsch R, Haussler D. 2008. Using native and syntenically mapped cDNA  
13 alignments to improve de novo gene finding. *Bioinformatics* 24:637-644.
- 14 Stuessy T, Weiss-Schneeweiss H. 2019. What drives polyploidization in plants? *The New phytologist*  
15 223:1690.
- 16 Tachibana Y. 1984. *Phragmites communis* Trin. in Lake Biwa. *Bull. Water Plant Soc. Japan* 18:2-6.
- 17 Tanaka TS, Irbis C, Inamura T. 2017. Phylogenetic analyses of *Phragmites* spp. in southwest China identified  
18 two lineages and their hybrids. *Plant Systematics and Evolution* 303:699-707.
- 19 Tvedte ES, Ward AC, Trendle B, Forbes AA, Logsdon JM. 2020. Genome evolution in a putatively asexual  
20 wasp. *bioRxiv*.
- 21 Wang X-J, Barrett SC, Zhong L, Wu Z-K, Li D-Z, Wang H, Zhou W. 2021. The Genomic Selfing Syndrome  
22 Accompanies the Evolutionary Breakdown of Heterostyly. *Molecular biology and evolution* 38:168-180.
- 23 Weiß CL, Pais M, Cano LM, Kamoun S, Burbano HA. 2018. nQuire: a statistical framework for ploidy  
24 estimation using next generation sequencing. *BMC bioinformatics* 19:1-8.
- 25 Zhang J, Wang M, Guo Z, Guan Y, Guo Y, Yan X. 2020. Variation in ploidy level and genome size of *Cynodon*  
26 *dactylon* (L.) Pers. along a latitudinal gradient. *Folia Geobotanica*:1-12.
- 27 Zimin AV, Marçais G, Puiu D, Roberts M, Salzberg SL, Yorke JA. 2013. The MaSuRCA genome assembler.  
28 *Bioinformatics* 29:2669-2677.
- 29
